# Supplementary material
Source: ML conference proceedings conference paper supplement (https://proceedings.neurips.cc/paper_files/paper/2022/hash/2f13806d6580db60d9d7d6f89ba529ca-Abstract.html)
Supplement: Supplementary file 1 [file 2f13806d6580db60d9d7d6f89ba529ca-Supplemental-Conference.pdf]

## A Further Experiments and Additional Results

In the following, we provide the detailed machine learning models for our experiments:

**1) Logistic Regression Model:** We use the following min-max regression problem with datasets  $\xi_i := \{(\mathbf{a}_{ij}, b_{ij})\}_{j=1}^n$ , where  $\mathbf{a}_{ij} \in \mathbb{R}^d$  is the feature of the  $j$ -th sample of worker  $i$  and  $b_{ij} \in \{1, -1\}$  is the associated label:

$$\min_{\mathbf{x} \in \mathbb{R}^d} \max_{\mathbf{y} \in \mathbb{R}^n} \frac{1}{m} \sum_{i \in M} f_i(\mathbf{x}, \mathbf{y}),$$

where  $f_i(\mathbf{x}, \mathbf{y})$  is defined as:

$$f_i(\mathbf{x}, \mathbf{y}) \triangleq \frac{1}{n} \sum_{j=1}^n [y_j l_j(\mathbf{x}) - V(\mathbf{y}) + g(\mathbf{x})], \quad (4)$$

where the loss function  $l_i(\mathbf{x}) \triangleq \log(1 + \exp(-b_{ij} \mathbf{a}_{ij}^\top \mathbf{x}))$ ,  $g(\mathbf{x}) \triangleq \lambda_2 \sum_{k=1}^d \frac{\alpha x_k^2}{1 + \alpha x_k^2}$ , and  $V(\mathbf{y}) = \frac{1}{2} \lambda_1 \|n\mathbf{y} - \mathbf{1}\|_2^2$ . We choose constants  $\lambda_1 = 1/n^2$ ,  $\lambda_2 = 10^{-3}$  and  $\alpha = 10$ .

**2) AUC Maximization:** We use a dataset  $\{\mathbf{a}_{ij}, b_{ij}\}_{j=1}^n$ , where  $\mathbf{a}_{ij} \in \mathbb{R}^d$  is the feature of the  $j$ -th sample of worker  $i$ ,  $\mathbf{w}_i$  denotes a feature vector and  $b_{ij} \in \{-1, +1\}$  denotes the corresponding label. For a scoring function  $h_{\mathbf{x}}$  of a classification model parameterized by  $\mathbf{x} \in \mathbb{R}^d$ , the AUC maximization problem is defined as:

$$\max_{\mathbf{x}} \frac{1}{m^+ m^-} \sum_{b_{ij}=+1, b_{ik}=-1} \mathbb{I}_{\{h_{\mathbf{x}}(\mathbf{a}_{ij}) \geq h_{\mathbf{x}}(\mathbf{a}_{ik})\}}, \quad (5)$$

where  $m^+$  denotes the number of positive samples,  $m^-$  denotes the number of negative samples, and  $\mathbb{I}_{\{\cdot\}}$  represents the indicator function. The above optimization problem can be reformulated as the following min-max optimization problem [1, 2]:

$$\begin{aligned} & \min_{(\mathbf{x}, c_1, c_2) \in \mathbb{R}^{d+2}} \max_{\lambda \in \mathbb{R}} f(\mathbf{x}, c_1, c_2, \lambda) \\ & := \frac{1}{mn} \sum_{i \in M} \sum_{j=1}^n \left\{ (1-\tau)(h_{\mathbf{x}}(\mathbf{a}_{ij}) - c_1)^2 \mathbb{I}_{\{b_{ij}=1\}} - \tau(1-\tau)\lambda^2 \right. \\ & \quad \left. + \tau(h_{\mathbf{x}}(\mathbf{a}_{ij}) - c_2)^2 \mathbb{I}_{\{b_{ij}=-1\}} + 2(1+\lambda)\tau h_{\mathbf{x}}(\mathbf{a}_{ij}) \mathbb{I}_{\{b_{ij}=-1\}} \right. \\ & \quad \left. - 2(1+\lambda)(1-\tau)h_{\mathbf{x}}(\mathbf{a}_{ij}) \mathbb{I}_{\{b_{ij}=1\}} \right\}, \end{aligned} \quad (6)$$

where  $\tau := m^+ / (m^+ + m^-)$  is the fraction of positive data. Note that  $f(\mathbf{x}, c_1, c_2, \cdot)$  is strongly concave for any  $(\mathbf{x}, c_1, c_2) \in \mathbb{R}^{d+2}$ .

**3) Generator Adversarial Networks (GANs):** Although our paper is focused on general non-convex-PL min-max problems, we believe that our paper will benefit from comparing further experimental results on the convergence performance of nonconvex-nonconcave problems (e.g., GANs), since the non-convex-PL problem is a special case for nonconvex-nonconcave min-max problems.

In our experiment, generator network is parameterized by  $\mathbf{x}$  as  $G_{\mathbf{x}}$  and the discriminator network parameterized by  $\mathbf{y}$  as  $D_{\mathbf{y}}$ . We adopt the following loss function:

$$f_i(\mathbf{x}, \mathbf{y}) = \mathbb{E}_{\mathbf{a}_i \sim \mathcal{P}_{true}} [\log D_{\mathbf{y}}(\mathbf{a}_i)] + \mathbb{E}_{\mathbf{z} \sim \mathcal{P}_z} [\log(1 - D_{\mathbf{y}}(G_{\mathbf{x}}(\mathbf{z})))]$$

where  $\mathbf{a}_i$  is the data point on client  $i$  and  $\mathcal{P}_{true}$  is the distribution of the true samples.  $\mathbf{z}$  denotes the input noise vector and  $\mathcal{P}_z$  is the prior distribution of the noise vector for generating samples. We have tested the convergence performance of our algorithms using the MNIST dataset. We chose the learning rates as  $\eta_{x,l} = \eta_{y,l} = 10^{-2}$ ,  $\eta_{x,g} = \eta_{y,g} = 2$ , local updates

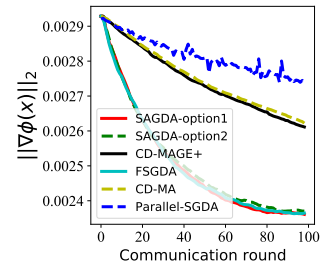

Figure 3: GANs under “MNIST” dataset.

$K = 10$ . We have  $m = 100$  clients and each client has  $n = 100$  samples. Again, from Fig. 3, we can observe that both our proposed algorithms FSGDA and SAGDA have better convergence performance compared with the baselines.

**Impact of the Local Steps:** In this section, we run additional experiments to investigate the impact of the local steps  $K$  on the training performance. We run FSGDA and SAGDA over the heterogenous ‘‘a9a’’ [40] dataset with the regression model mentioned in Section 4. We fix the local step-size at 0.01, worker number at 100, and choose the number of local update rounds  $K$  from the discrete set  $\{2, 10, 20\}$ . In terms of communication round, the gradient norm  $\|\nabla\phi(\mathbf{x})\|^2$  decreases as  $K$  increases. This is due to the fact that the algorithm needs more communication round while  $K$  is small, which matches our Corollary 2 and Corollary 3.

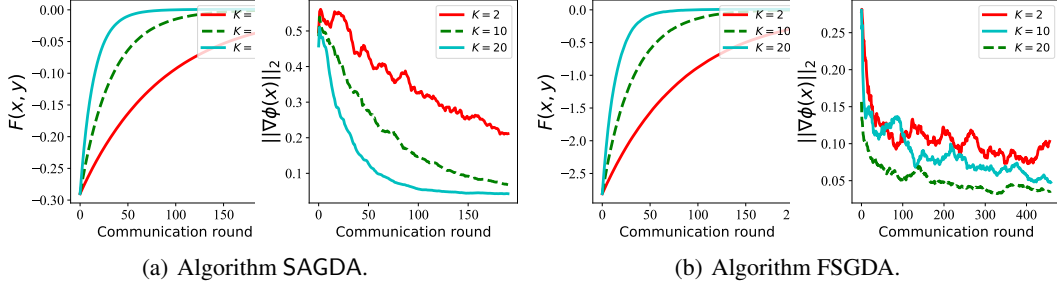

Figure 4: Algorithm performance under different local  $K$  steps.

**Impact of the Local Step-size:** In this experiment, we choose the value of the local step-sizes from the discrete set  $\{0.0001, 0.001, 0.01\}$  and fix worker number at 100, local update rounds at 10. As shown in Fig. 5(a) and Fig.6(a), larger local step-sizes lead to faster convergence rates.

**Impact of the Global Step-size:** we choose the global step-sizes value from the discrete set  $\{2, 5, 10\}$  and fix worker number at 100, local update rounds at 10. As shown in Fig. 5(b) and 6(b) and, larger global step-sizes lead to faster convergence rates.

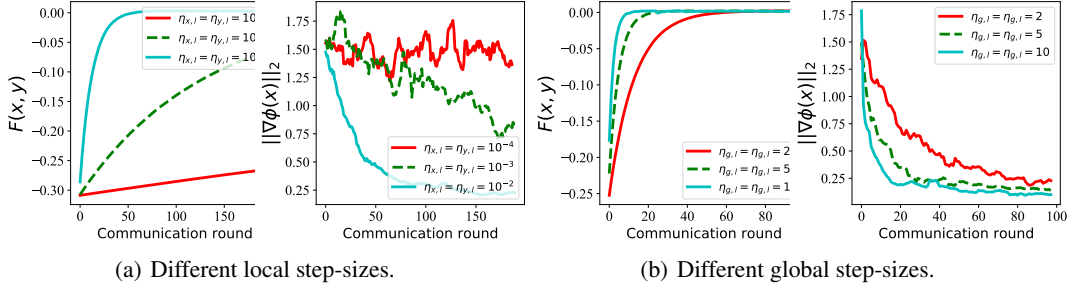

Figure 5: The FSGDA algorithm under different step-sizes.

## B Proof

### B.1 Proof for FSGDA

For notational simplicity and clarity, we have the following definitions.

$$\begin{aligned} \Phi(\mathbf{x}) &= \max_{\mathbf{y} \in \mathbb{R}^d} f(\mathbf{x}, \mathbf{y}); \\ \mathbf{z}_t &= (\mathbf{x}_t, \mathbf{y}_t); \\ \eta_x &= \eta_{x,g} \eta_{x,l}, \eta_y = \eta_{y,g} \eta_{y,l}; \\ \mathbf{u}_{x,t} &= \frac{1}{m} \sum_{i \in S_t} \nabla_x f_i(\mathbf{z}_t), \mathbf{u}_{y,t} = \frac{1}{m} \sum_{i \in S_t} \nabla_y f_i(\mathbf{z}_t). \end{aligned}$$

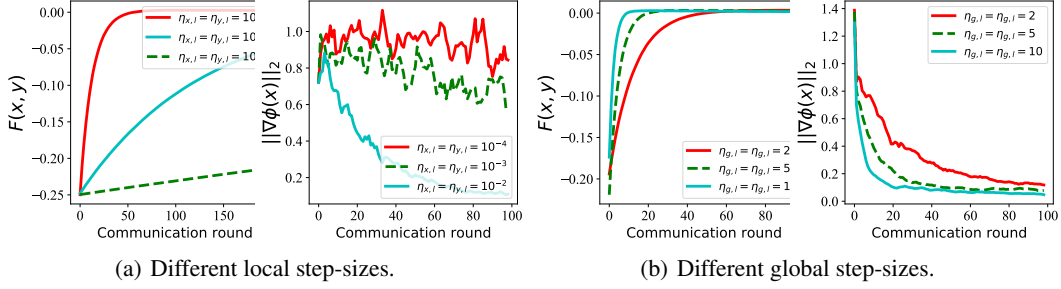

Figure 6: The SAGDA algorithm under different step-sizes.

For simplicity, we write the update step uniformly:

$$\begin{aligned}\mathbf{x}_{t+1} &= \mathbf{x}_t - \eta_x K(\mathbf{u}_{x,t} - \mathbf{e}_{x,t}), \\ \mathbf{y}_{t+1} &= \mathbf{y}_t + \eta_y K(\mathbf{u}_{y,t} - \mathbf{e}_{y,t}).\end{aligned}$$

For FSGDA, the update rule is:

$$\begin{aligned}\mathbf{x}_{t+1} &= \mathbf{x}_t - \eta_{x,g} \eta_{x,l} \left( \frac{1}{m} \sum_{i \in S_t} \sum_{j \in [K]} \nabla_x f_i(\mathbf{z}_{t,i}^j, \xi_{t,i}^j) \right), \\ \mathbf{y}_{t+1} &= \mathbf{y}_t + \eta_{y,g} \eta_{y,l} \left( \frac{1}{m} \sum_{i \in S_t} \sum_{j \in [K]} \nabla_y f_i(\mathbf{z}_{t,i}^j, \xi_{t,i}^j) \right), \\ \mathbf{e}_{x,t} &= \frac{1}{mK} \sum_{i \in S_t} \sum_{j \in [K]} \left( \nabla_x f_i(\mathbf{z}_t) - \nabla_x f_i(\mathbf{z}_{t,i}^j, \xi_{t,i}^j) \right), \\ \bar{\mathbf{e}}_{x,t} &= \mathbb{E}[\mathbf{e}_{x,t}] = \frac{1}{mK} \sum_{i \in S_t} \sum_{j \in [K]} \left( \nabla_x f_i(\mathbf{z}_t) - \nabla_x f_i(\mathbf{z}_{t,i}^j) \right), \\ \mathbf{e}_{y,t} &= \frac{1}{mK} \sum_{i \in S_t} \sum_{j \in [K]} \left( \nabla_y f_i(\mathbf{z}_t) - \nabla_y f_i(\mathbf{z}_{t,i}^j, \xi_{t,i}^j) \right), \\ \bar{\mathbf{e}}_{y,t} &= \mathbb{E}[\mathbf{e}_{y,t}] = \frac{1}{mK} \sum_{i \in S_t} \sum_{j \in [K]} \left( \nabla_y f_i(\mathbf{z}_t) - \nabla_y f_i(\mathbf{z}_{t,i}^j) \right).\end{aligned}$$

Note the above expectation is only on the stochastic noise.

**Lemma 1.**

$$\begin{aligned}\mathbb{E} \|\Delta \mathbf{x}_t\|^2 &= \mathbb{E} \|\mathbf{u}_{x,t} - \mathbf{e}_{x,t}\|^2 \leq 4\mathbb{E} \|\bar{\mathbf{e}}_{x,t}\|^2 + 4\mathbb{E} \|\mathbf{u}_{x,t}\|^2 + \frac{2}{mK} \sigma_x^2, \\ \mathbb{E} \|\Delta \mathbf{x}_t\|^2 &= \mathbb{E} \|\mathbf{u}_{y,t} - \mathbf{e}_{y,t}\|^2 \leq 4\mathbb{E} \|\bar{\mathbf{e}}_{y,t}\|^2 + 4\mathbb{E} \|\mathbf{u}_{y,t}\|^2 + \frac{2}{mK} \sigma_y^2.\end{aligned}$$

*Proof.*

$$\begin{aligned}\mathbb{E} \|\mathbf{u}_{x,t} - \mathbf{e}_{x,t}\|^2 &= \mathbb{E} \|\mathbf{u}_{x,t} - \bar{\mathbf{e}}_{x,t} + (\bar{\mathbf{e}}_{x,t} - \mathbf{e}_{x,t})\|^2 \\ &\leq 2\mathbb{E} \|\mathbf{u}_{x,t} - \bar{\mathbf{e}}_{x,t}\|^2 + 2\mathbb{E} \|(\bar{\mathbf{e}}_{x,t} - \mathbf{e}_{x,t})\|^2 \\ &\leq 4\mathbb{E} \|\bar{\mathbf{e}}_{x,t}\|^2 + 4\mathbb{E} \|\mathbf{u}_{x,t}\|^2 + \frac{2}{mK} \sigma_x^2,\end{aligned}$$

where the second inequality follows from the fact that  $\{\nabla_x f_i(\mathbf{z}_{t,i}^j, \xi_{t,i}^j) - \nabla_x f_i(\mathbf{z}_{t,i}^j)\}$  the martingale difference sequence (see Lemma 4 in [28]).

The bound of  $\|\mathbf{u}_{y,t} - \mathbf{e}_{y,t}\|^2$  follows from the similar proof.  $\square$

**Lemma 2** (One Round Progress for  $\Phi$ ).

$$\begin{aligned} \mathbb{E}\Phi(\mathbf{x}_{t+1}) - \Phi(\mathbf{x}_t) &\leq -\frac{1}{2}\eta_x K \|\nabla\Phi(\mathbf{x}_t)\|^2 - \frac{1}{4}\eta_x K \|\nabla_x f(\mathbf{z}_t)\|^2 + 2L\eta_x^2 K^2 \mathbb{E}\|\mathbf{u}_{x,t}\|^2 \\ &\quad + \eta_x K \left(\frac{3}{2} + 2L\eta_x K\right) \mathbb{E}\|\bar{\mathbf{e}}_{x,t}\|^2 + \eta_x K \frac{L_f^2}{\mu^2} \|\nabla_y f(\mathbf{z}_t)\|^2 + \frac{L\eta_x^2 K}{m} \sigma_x^2. \end{aligned}$$

*Proof.* Due to the  $L$ -smoothness of  $\Phi(\mathbf{x})$ , we have one step update in expectation conditioned on step  $t$ :

$$\begin{aligned} \mathbb{E}\Phi(\mathbf{x}_{t+1}) - \Phi(\mathbf{x}_t) &\leq \langle \nabla\Phi(\mathbf{x}_t), \mathbb{E}[\mathbf{x}_{t+1} - \mathbf{x}_t] \rangle + \frac{L}{2} \mathbb{E}\|\mathbf{x}_{t+1} - \mathbf{x}_t\|^2 \\ &= \underbrace{\langle \nabla\Phi(\mathbf{x}_t), -\eta_x K \mathbb{E}[\mathbf{u}_{x,t} - \mathbf{e}_{x,t}] \rangle}_{A_1} + \underbrace{\frac{L}{2} \mathbb{E}\|\eta_x K (\mathbf{u}_{x,t} - \mathbf{e}_{x,t})\|^2}_{A_2}. \end{aligned}$$

$$\begin{aligned} A_1 &= \langle \nabla\Phi(\mathbf{x}_t), -\eta_x K \mathbb{E}(\nabla_x f(\mathbf{z}_t) - \bar{\mathbf{e}}_{x,t}) \rangle \\ &= -\frac{1}{2}\eta_x K \|\nabla\Phi(\mathbf{x}_t)\|^2 - \frac{1}{2}\eta_x K \mathbb{E}\|\nabla_x f(\mathbf{z}_t) - \bar{\mathbf{e}}_{x,t}\|^2 + \frac{1}{2}\eta_x K \mathbb{E}\|\nabla\Phi(\mathbf{x}_t) - \nabla_x f(\mathbf{z}_t) + \bar{\mathbf{e}}_{x,t}\|^2 \\ &\leq -\frac{1}{2}\eta_x K \|\nabla\Phi(\mathbf{x}_t)\|^2 - \frac{1}{4}\eta_x K \|\nabla_x f(\mathbf{z}_t)\|^2 + \frac{3}{2}\eta_x K \mathbb{E}\|\bar{\mathbf{e}}_{x,t}\|^2 + \eta_x K \|\nabla\Phi(\mathbf{x}_t) - \nabla_x f(\mathbf{z}_t)\|^2, \end{aligned}$$

where the last inequality follows from  $\|\mathbf{a} + \mathbf{b}\|^2 \geq \frac{1}{2}\|\mathbf{a}\|^2 - \|\mathbf{b}\|^2$  and  $\|\mathbf{a} + \mathbf{b}\|^2 \leq 2\|\mathbf{a}\|^2 + 2\|\mathbf{b}\|^2$ .

$$A_2 \leq 2L\eta_x^2 K^2 \mathbb{E}\|\bar{\mathbf{e}}_{x,t}\|^2 + 2L\eta_x^2 K^2 \mathbb{E}\|\mathbf{u}_{x,t}\|^2 + \frac{L\eta_x^2 K}{m} \sigma_x^2,$$

where the inequality is due to Lemma 1.

$$\begin{aligned} \|\nabla\Phi(\mathbf{x}_t) - \nabla_x f(\mathbf{z}_t)\|^2 &= L_f^2 \|\mathbf{y}(\mathbf{x}_t) - \mathbf{y}^*\|^2 \\ &\leq \frac{L_f^2}{\mu^2} \|\nabla_y f(\mathbf{z}_t)\|^2, \end{aligned}$$

where the last inequality is due to the PL condition (Theorem 2 in [42]).

Combining pieces together, we have:

$$\begin{aligned} \mathbb{E}\Phi(\mathbf{x}_{t+1}) - \Phi(\mathbf{x}_t) &= \underbrace{\langle \nabla\Phi(\mathbf{x}_t), -\eta_x K \mathbb{E}[\mathbf{u}_{x,t} - \mathbf{e}_{x,t}] \rangle}_{A_1} + \underbrace{\frac{L}{2} \mathbb{E}\|\eta_x K (\mathbf{u}_{x,t} - \mathbf{e}_{x,t})\|^2}_{A_2} \\ &\leq -\frac{1}{2}\eta_x K \|\nabla\Phi(\mathbf{x}_t)\|^2 - \frac{1}{4}\eta_x K \|\nabla_x f(\mathbf{z}_t)\|^2 + 2L\eta_x^2 K^2 \mathbb{E}\|\mathbf{u}_{x,t}\|^2 \\ &\quad + \eta_x K \left(\frac{3}{2} + 2L\eta_x K\right) \mathbb{E}\|\bar{\mathbf{e}}_{x,t}\|^2 + \eta_x K \frac{L_f^2}{\mu^2} \|\nabla_y f(\mathbf{z}_t)\|^2 + \frac{L\eta_x^2 K}{m} \sigma_x^2. \end{aligned}$$

□

**Lemma 3** (One Round Progress for  $f$ ).

$$\begin{aligned} f(\mathbf{z}_t) - \mathbb{E}f(\mathbf{z}_{t+1}) &\leq \frac{3}{2}\eta_x K \|\nabla_x f(\mathbf{z}_t)\|^2 + 2L_f\eta_x^2 K^2 \mathbb{E}\|\mathbf{u}_{x,t}\|^2 + \eta_x K \left(\frac{1}{2} + 2L_f\eta_x K\right) \mathbb{E}\|\bar{\mathbf{e}}_{x,t}\|^2 + \frac{L_f\eta_x^2 K}{m} \sigma_x^2 \\ &\quad - \frac{1}{2}\eta_y K \|\nabla_y f(\mathbf{z}_t)\|^2 + 2L_f\eta_y^2 K^2 \mathbb{E}\|\mathbf{u}_{y,t}\|^2 + \eta_y K \left(\frac{1}{2} + 2L_f\eta_y K\right) \mathbb{E}\|\bar{\mathbf{e}}_{y,t}\|^2 + \frac{L_f\eta_y^2 K}{m} \sigma_y^2. \end{aligned}$$

*Proof.* Similarly, due to  $L$ -smoothness of  $f(\mathbf{z})$ , we have:

$$\begin{aligned}
f(\mathbf{z}_t) - \mathbb{E}f(\mathbf{z}_{t+1}) &\leq \eta_x K \mathbb{E} \langle \nabla_x f(\mathbf{z}_t), \mathbf{u}_{x,t} - \mathbf{e}_{x,t} \rangle - \eta_y K \mathbb{E} \langle \nabla_y f(\mathbf{z}_t), \mathbf{u}_{y,t} - \mathbf{e}_{y,t} \rangle \\
&\quad + \frac{L_f \eta_x^2 K^2}{2} \mathbb{E} \|\mathbf{u}_{x,t} - \mathbf{e}_{x,t}\|^2 + \frac{L_f \eta_y^2 K^2}{2} \mathbb{E} \|\mathbf{u}_{y,t} - \mathbf{e}_{y,t}\|^2 \\
&= \eta_x K \mathbb{E} \langle \nabla_x f(\mathbf{z}_t), \nabla_x f(\mathbf{z}_t) - \bar{\mathbf{e}}_{x,t} \rangle - \eta_y K \mathbb{E} \langle \nabla_y f(\mathbf{z}_t), \nabla_y f(\mathbf{z}_t) - \bar{\mathbf{e}}_{y,t} \rangle \\
&\quad + \frac{L_f \eta_x^2 K^2}{2} \mathbb{E} \|\mathbf{u}_{x,t} - \mathbf{e}_{x,t}\|^2 + \frac{L_f \eta_y^2 K^2}{2} \mathbb{E} \|\mathbf{u}_{y,t} - \mathbf{e}_{y,t}\|^2 \\
&\leq \frac{3}{2} \eta_x K \|\nabla_x f(\mathbf{z}_t)\|^2 + \frac{1}{2} \eta_x K \mathbb{E} \|\bar{\mathbf{e}}_{x,t}\|^2 - \frac{1}{2} \eta_y K \|\nabla_y f(\mathbf{z}_t)\|^2 + \frac{1}{2} \eta_y K \mathbb{E} \|\bar{\mathbf{e}}_{y,t}\|^2 \\
&\quad + \frac{L_f \eta_x^2 K^2}{2} \mathbb{E} \|\mathbf{u}_{x,t} - \mathbf{e}_{x,t}\|^2 + \frac{L_f \eta_y^2 K^2}{2} \mathbb{E} \|\mathbf{u}_{y,t} - \mathbf{e}_{y,t}\|^2 \\
&\leq \frac{3}{2} \eta_x K \|\nabla_x f(\mathbf{z}_t)\|^2 + 2L_f \eta_x^2 K^2 \mathbb{E} \|\mathbf{u}_{x,t}\|^2 + \eta_x K \left( \frac{1}{2} + 2L_f \eta_x K \right) \mathbb{E} \|\bar{\mathbf{e}}_{x,t}\|^2 + \frac{L_f \eta_x^2 K}{m} \sigma_x^2 \\
&\quad - \frac{1}{2} \eta_y K \|\nabla_y f(\mathbf{z}_t)\|^2 + 2L_f \eta_y^2 K^2 \mathbb{E} \|\mathbf{u}_{y,t}\|^2 + \eta_y K \left( \frac{1}{2} + 2L_f \eta_y K \right) \mathbb{E} \|\bar{\mathbf{e}}_{y,t}\|^2 + \frac{L_f \eta_y^2 K}{m} \sigma_y^2.
\end{aligned}$$

□

**Lemma 4** (Bounded Error for FSGDA).

$$\begin{aligned}
\mathbb{E} \|\bar{\mathbf{e}}_{x,t}\|^2 &\leq L_f^2 \left[ 40K^2 \eta_{x,l}^2 \|\nabla_x f(\mathbf{z}_t)\|^2 + 40K^2 \eta_{y,l}^2 \|\nabla_y f(\mathbf{z}_t)\|^2 + 40K^2 \eta_{x,l}^2 \sigma_{x,G}^2 + 40K^2 \eta_{y,l}^2 \sigma_{y,G}^2 \right. \\
&\quad \left. + 5K \eta_{x,l}^2 \sigma_x^2 + 5K \eta_{y,l}^2 \sigma_y^2 \right], \\
\mathbb{E} \|\bar{\mathbf{e}}_{y,t}\|^2 &\leq L_f^2 \left[ 40K^2 \eta_{x,l}^2 \|\nabla_x f(\mathbf{z}_t)\|^2 + 40K^2 \eta_{y,l}^2 \|\nabla_y f(\mathbf{z}_t)\|^2 + 40K^2 \eta_{x,l}^2 \sigma_{x,G}^2 + 40K^2 \eta_{y,l}^2 \sigma_{y,G}^2 \right. \\
&\quad \left. + 5K \eta_{x,l}^2 \sigma_x^2 + 5K \eta_{y,l}^2 \sigma_y^2 \right].
\end{aligned}$$

*Proof.*

$$\begin{aligned}
\mathbb{E} \|\bar{\mathbf{e}}_{x,t}\|^2 &= \mathbb{E} \left\| \frac{1}{mK} \sum_{i \in S_t} \sum_{j \in [K]} \left( \nabla_x f_i(\mathbf{z}_t) - \nabla_x f_i(\mathbf{z}_{t,i}^j) \right) \right\|^2 \\
&\leq \mathbb{E} \left[ \frac{1}{K} \sum_{i \in S_t} \sum_{j \in [K]} \left\| \nabla_x f_i(\mathbf{z}_t) - \nabla_x f_i(\mathbf{z}_{t,i}^j) \right\|^2 \right] \\
&\leq \frac{L_f^2}{MK} \sum_{i \in [M]} \sum_{j \in [K]} \mathbb{E} \left\| \mathbf{z}_t - \mathbf{z}_{t,i}^j \right\|^2 \\
\mathbb{E} \left\| \mathbf{z}_t - \mathbf{z}_{t,i}^{j+1} \right\|^2 &= \mathbb{E} \left[ \left\| \mathbf{x}_{t,i}^j - \mathbf{x}_t - \eta_{x,l} \nabla_x f_i(\mathbf{z}_{t,i}^j, \xi_{t,i}^j) \right\|^2 \right] + \mathbb{E} \left[ \left\| \mathbf{y}_{t,i}^j - \mathbf{y}_t - \eta_{y,l} \nabla_y f_i(\mathbf{z}_{t,i}^j, \xi_{t,i}^j) \right\|^2 \right] \\
&\leq \mathbb{E} \left[ \left\| \mathbf{x}_{t,i}^j - \mathbf{x}_t - \eta_{x,l} \nabla_x f_i(\mathbf{z}_{t,i}^j) \right\|^2 \right] + \mathbb{E} \left[ \left\| \mathbf{y}_{t,i}^j - \mathbf{y}_t - \eta_{y,l} \nabla_y f_i(\mathbf{z}_{t,i}^j) \right\|^2 \right] + \eta_{x,l}^2 \sigma_x^2 + \eta_{y,l}^2 \sigma_y^2 \\
&\leq \left( 1 + \frac{1}{2K-1} \right) \left\| \mathbf{z}_{t,i}^j - \mathbf{z}_t \right\|^2 + 2K \eta_{x,l}^2 \left\| \nabla_x f_i(\mathbf{z}_{t,i}^j) \right\|^2 + 2K \eta_{y,l}^2 \left\| \nabla_y f_i(\mathbf{z}_{t,i}^j) \right\|^2 + \eta_{x,l}^2 \sigma_x^2 + \eta_{y,l}^2 \sigma_y^2 \\
&\leq \left( 1 + \frac{1}{2K-1} \right) \left\| \mathbf{z}_{t,i}^j - \mathbf{z}_t \right\|^2 + 4K \eta_{x,l}^2 \left\| \nabla_x f_i(\mathbf{z}_{t,i}^j) - \nabla_x f_i(\mathbf{z}_t) \right\|^2 + 4K \left\| \nabla_x f_i(\mathbf{z}_t) \right\|^2 \\
&\quad + 4K \eta_{y,l}^2 \left\| \nabla_y f_i(\mathbf{z}_{t,i}^j) - \nabla_y f_i(\mathbf{z}_t) \right\|^2 + 4K \eta_{y,l}^2 \left\| \nabla_y f_i(\mathbf{z}_t) \right\|^2 + \eta_{x,l}^2 \sigma_x^2 + \eta_{y,l}^2 \sigma_y^2
\end{aligned}$$

$$\begin{aligned}
&\leq \left(1 + \frac{1}{2K-1} + 4K \max\{L_f^2 \eta_{x,l}^2, L_f^2 \eta_{y,l}^2\}\right) \left\| \mathbf{z}_{t,i}^j - \mathbf{z}_t \right\|^2 \\
&\quad + 4K \eta_{x,l}^2 \|\nabla_x f_i(\mathbf{z}_t)\|^2 + 4K \eta_{y,l}^2 \|\nabla_y f_i(\mathbf{z}_t)\|^2 + \eta_{x,l}^2 \sigma_x^2 + \eta_{y,l}^2 \sigma_y^2 \\
&\leq \left(1 + \frac{1}{K-1}\right) \left\| \mathbf{z}_{t,i}^j - \mathbf{z}_t \right\|^2 + 4K \|\nabla_x f_i(\mathbf{z}_t)\|^2 + 4K \eta_{y,l}^2 \|\nabla_y f_i(\mathbf{z}_t)\|^2 + \eta_{x,l}^2 \sigma_x^2 + \eta_{y,l}^2 \sigma_y^2 \\
&\leq \sum_{\tau=0}^{j-1} \left(1 + \frac{1}{K-1}\right)^\tau \left[4K \eta_{x,l}^2 \|\nabla_x f_i(\mathbf{z}_t)\|^2 + 4K \eta_{y,l}^2 \|\nabla_y f_i(\mathbf{z}_t)\|^2 + \eta_{x,l}^2 \sigma_x^2 + \eta_{y,l}^2 \sigma_y^2\right] \\
&\leq 20K^2 \eta_{x,l}^2 \|\nabla_x f_i(\mathbf{z}_t)\|^2 + 20K^2 \eta_{y,l}^2 \|\nabla_y f_i(\mathbf{z}_t)\|^2 + 5K \eta_{x,l}^2 \sigma_x^2 + 5K \eta_{y,l}^2 \sigma_y^2 \\
&\leq 40K^2 \eta_{x,l}^2 \|\nabla_x f(\mathbf{z}_t)\|^2 + 40K^2 \eta_{y,l}^2 \|\nabla_y f(\mathbf{z}_t)\|^2 + 40K^2 \eta_{x,l}^2 \sigma_{x,G}^2 + 40K^2 \eta_{y,l}^2 \sigma_{y,G}^2 \\
&\quad + 5K \eta_{x,l}^2 \sigma_x^2 + 5K \eta_{y,l}^2 \sigma_y^2,
\end{aligned}$$

where the first inequality is due to bounded variance of stochastic gradient, the second and third inequalities follow from the fact  $\|\mathbf{a} + \mathbf{b}\|^2 \leq (1 + \frac{1}{\epsilon}) \|\mathbf{a}\|^2 + (1 + \epsilon) \|\mathbf{b}\|^2$ , the fourth inequality is due to smoothness of  $f$  in  $x$  and  $y$ , fifth inequality holds if

$$4K \max\{L_f^2 \eta_{x,l}^2, L_f^2 \eta_{y,l}^2\} \leq \frac{1}{2(K-1)(2K-1)}, \quad (7)$$

the second last inequality follows from the  $\sum_{\tau=0}^{j-1} \left(1 + \frac{1}{K-1}\right)^\tau \leq (K-1) \left[\left(1 + \frac{1}{K-1}\right)^K - 1\right] \leq 5K$ , and the last inequality is due to the Assumption 4.

Plugging into the bound of  $\|\bar{\mathbf{e}}_{x,t}\|^2$ , we have:

$$\begin{aligned}
\|\bar{\mathbf{e}}_{x,t}\|^2 &\leq L_f^2 \left[40K^2 \eta_{x,l}^2 \|\nabla_x f(\mathbf{z}_t)\|^2 + 40K^2 \eta_{y,l}^2 \|\nabla_y f(\mathbf{z}_t)\|^2 + 40K^2 \eta_{x,l}^2 \sigma_{x,G}^2 + 40K^2 \eta_{y,l}^2 \sigma_{y,G}^2\right. \\
&\quad \left.+ 5K \eta_{x,l}^2 \sigma_x^2 + 5K \eta_{y,l}^2 \sigma_y^2\right].
\end{aligned}$$

The bound of  $\|\bar{\mathbf{e}}_{y,t}\|^2$  follows from the similar proof.  $\square$

**Theorem 2** (Convergence Rate for FSGDA). *Under Assumptions 1- 4, define  $\mathcal{L}_t = \Phi(\mathbf{x}_t) - \frac{1}{10} f(\mathbf{x}_t, \mathbf{y}_t)$ , if the learning rates  $\eta_{x,g}$ ,  $\eta_{x,l}$ ,  $\eta_{y,g}$ , and  $\eta_{y,l}$  satisfy:*

$$\begin{aligned}
8K(K-1)(2K-1)L_f^2 \max\{\eta_{x,l}^2, \eta_{y,l}^2\} &\leq 1, \\
a_1 - a_3 40L_f^2 K^2 \eta_{x,l}^2 - \frac{\eta_y}{\eta_x} a_4 40L_f^2 K^2 \eta_{x,l}^2 &\geq 0, \\
a_2 - a_3 \frac{\eta_x}{\eta_y} 40L_f^2 K^2 \eta_{y,l}^2 - a_4 40L_f^2 K^2 \eta_{y,l}^2 &\geq 0,
\end{aligned}$$

where  $a_1 = \left(\frac{1}{10} - 2(2L + \frac{1}{5}L_f)\eta_x K\right)$ ,  $a_2 = \left(\frac{1}{20} - \frac{2}{5}L_f \eta_y K - \frac{\eta_x}{\eta_y} \frac{L_f^2}{\mu^2}\right)$ ,  $a_3 = \left(\frac{31}{20} + (2L + \frac{1}{5}L_f)\eta_x K\right)$  and  $a_4 = \left(\frac{1}{20} + \frac{1}{5}L_f \eta_y K\right)$ , then the output sequence  $\{\mathbf{x}_t\}$  generated by FSGDA satisfies:

$$\frac{1}{T} \sum_{t=0}^{T-1} \mathbb{E} \|\nabla \Phi(\mathbf{x}_t)\|^2 \leq \underbrace{\frac{2(\mathcal{L}_0 - \mathcal{L}_T)}{\eta_x K T}}_{\text{optimization error}} + \underbrace{\frac{2\eta_x}{m} \left(L + \frac{L_f}{100}\right) \sigma_x^2 + \frac{L_f \eta_y^2}{5m \eta_x} \sigma_y^2}_{\text{statistical error}} + \underbrace{\psi_3}_{\text{local update error}} + \underbrace{\psi_4}_{\text{sampling variance}}.$$

Here,  $\psi_3$  and  $\psi_4$  are defined as follows:

$$\begin{aligned}
\psi_3 &= 2 \left(a_3 L_f^2 + a_4 \frac{\eta_y}{\eta_x} L_f^2\right) \left[40K^2 \eta_{x,l}^2 \sigma_{x,G}^2 + 40K^2 \eta_{y,l}^2 \sigma_{y,G}^2 + 5K \eta_{x,l}^2 \sigma_x^2 + 5K \eta_{y,l}^2 \sigma_y^2\right], \\
\psi_4 &= \left((2L + \frac{1}{5}L_f)\eta_x K\right) \left(1 - \frac{m}{M}\right) \frac{2}{m} \sigma_{x,G}^2 + \frac{2}{5m} L_f \eta_y K \frac{\eta_y}{\eta_x} \left(1 - \frac{m}{M}\right) \sigma_{y,G}^2,
\end{aligned}$$

*Proof.* Define potential function  $\mathcal{L}_t = \Phi(\mathbf{x}_t) - \frac{1}{10}f(\mathbf{z}_t)$ ,

$$\begin{aligned}
\mathbb{E}\mathcal{L}_{t+1} - \mathcal{L}_t &= \mathbb{E}\Phi(\mathbf{x}_{t+1}) - \Phi(\mathbf{x}_t) + \frac{1}{10}(f(\mathbf{z}_t) - \mathbb{E}f(\mathbf{z}_{t+1})) \\
&\leq -\frac{1}{2}\eta_x K \|\nabla\Phi(\mathbf{x}_t)\|^2 - \frac{1}{10}\eta_x K \|\nabla_x f(\mathbf{z}_t)\|^2 + \left(2L + \frac{1}{5}L_f\right)\eta_x^2 K^2 \mathbb{E}\|\mathbf{u}_{x,t}\|^2 \\
&\quad - \eta_y K \left(\frac{1}{20} - \frac{\eta_x L_f^2}{\eta_y \mu^2}\right) \|\nabla_y f(\mathbf{z}_t)\|^2 + \frac{1}{5}L_f \eta_y^2 K^2 \mathbb{E}\|\mathbf{u}_{y,t}\|^2 \\
&\quad + \eta_x K \left(\frac{31}{20} + (2L + \frac{1}{5}L_f)\eta_x K\right) \mathbb{E}\|\bar{\mathbf{e}}_{x,t}\|^2 + \eta_y K \left(\frac{1}{20} + \frac{1}{5}L_f \eta_y K\right) \mathbb{E}\|\bar{\mathbf{e}}_{y,t}\|^2 \\
&\quad + \frac{\eta_x^2 K}{m} \left(L + \frac{L_f}{10}\right) \sigma_x^2 + \frac{L_f \eta_y^2 K}{10m} \sigma_y^2 \\
&\leq -\frac{1}{2}\eta_x K \|\nabla\Phi(\mathbf{x}_t)\|^2 - \underbrace{\eta_x K \left(\frac{1}{10} - 2(2L + \frac{1}{5}L_f)\eta_x K\right)}_{a_1} \|\nabla_x f(\mathbf{z}_t)\|^2 \\
&\quad - \underbrace{\eta_y K \left(\frac{1}{20} - \frac{2}{5}L_f \eta_y K - \frac{\eta_x L_f^2}{\eta_y \mu^2}\right)}_{a_2} \|\nabla_y f(\mathbf{z}_t)\|^2 \\
&\quad + \left(2L + \frac{1}{5}L_f\right)\eta_x^2 K^2 \left(1 - \frac{m}{M}\right) \frac{2}{m} \sigma_{x,G}^2 + \frac{1}{5}L_f \eta_y^2 K^2 \left(1 - \frac{m}{M}\right) \frac{2}{m} \sigma_{y,G}^2 \\
&\quad + \underbrace{\eta_x K \left(\frac{31}{20} + (2L + \frac{1}{5}L_f)\eta_x K\right)}_{a_3} \mathbb{E}\|\bar{\mathbf{e}}_{x,t}\|^2 + \underbrace{\eta_y K \left(\frac{1}{20} + \frac{1}{5}L_f \eta_y K\right)}_{a_4} \mathbb{E}\|\bar{\mathbf{e}}_{y,t}\|^2 \\
&\quad + \frac{\eta_x^2 K}{m} \left(L + \frac{L_f}{10}\right) \sigma_x^2 + \frac{L_f \eta_y^2 K}{10m} \sigma_y^2 \\
&\leq -\frac{1}{2}\eta_x K \|\nabla\Phi(\mathbf{x}_t)\|^2 + \frac{\eta_x^2 K}{m} \left(L + \frac{L_f}{10}\right) \sigma_x^2 + \frac{L_f \eta_y^2 K}{10m} \sigma_y^2 \\
&\quad + \left(2L + \frac{1}{5}L_f\right)\eta_x^2 K^2 \left(1 - \frac{m}{M}\right) \frac{2}{m} \sigma_{x,G}^2 + \frac{1}{5}L_f \eta_y^2 K^2 \left(1 - \frac{m}{M}\right) \frac{2}{m} \sigma_{y,G}^2 \\
&\quad + K(a_3 L_f^2 \eta_x + a_4 \eta_y L_f^2) [40K^2 \eta_{x,l}^2 \sigma_{x,G}^2 + 40K^2 \eta_{y,l}^2 \sigma_{y,G}^2 + 5K \eta_{x,l}^2 \sigma_x^2 + 5K \eta_{y,l}^2 \sigma_y^2],
\end{aligned}$$

where the second inequality is due to  $\mathbb{E}\|\mathbf{u}_{x,t}\|^2 \leq 2\|\nabla_x f(\mathbf{z}_t)\|^2 + 2\left(1 - \frac{m}{M}\right) \frac{\sigma_{x,G}^2}{m}$  and  $\mathbb{E}\|\mathbf{u}_{y,t}\|^2 \leq 2\|\nabla_y f(\mathbf{z}_t)\|^2 + 2\left(1 - \frac{m}{M}\right) \frac{\sigma_{y,G}^2}{m}$ , the last inequality follows from the conditions:

$$a_1 - a_3 40L_f^2 K^2 \eta_{x,l}^2 - \frac{\eta_y}{\eta_x} a_4 40L_f^2 K^2 \eta_{x,l}^2 \geq 0, \quad (8)$$

$$a_2 - a_3 \frac{\eta_x}{\eta_y} 40L_f^2 K^2 \eta_{y,l}^2 - a_4 40L_f^2 K^2 \eta_{y,l}^2 \geq 0. \quad (9)$$

Telescoping and rearranging, we have:

$$\begin{aligned}
\frac{1}{T} \sum_{t=0}^{T-1} \|\nabla\Phi(\mathbf{x}_t)\|^2 &\leq \frac{2(\mathcal{L}_0 - \mathcal{L}_*)}{\eta_x K T} + \frac{2\eta_x}{m} \left(L + \frac{L_f}{100}\right) \sigma_x^2 + \frac{L_f \eta_y^2}{5m\eta_x} \sigma_y^2 \\
&\quad + \left(2L + \frac{1}{5}L_f\right)\eta_x K \left(1 - \frac{m}{M}\right) \frac{2}{m} \sigma_{x,G}^2 + \frac{1}{5}L_f \eta_y K \frac{\eta_y}{\eta_x} \left(1 - \frac{m}{M}\right) \frac{2}{m} \sigma_{y,G}^2 \\
&\quad + 2 \left(a_3 L_f^2 + a_4 \frac{\eta_y}{\eta_x} L_f^2\right) [40K^2 \eta_{x,l}^2 \sigma_{x,G}^2 + 40K^2 \eta_{y,l}^2 \sigma_{y,G}^2 + 5K \eta_{x,l}^2 \sigma_x^2 + 5K \eta_{y,l}^2 \sigma_y^2].
\end{aligned}$$

□

## B.2 Proof for SAGDA Option I

For SAGDA Option I, the update rule is:

$$\begin{aligned}
\mathbf{x}_{t+1} &= \mathbf{x}_t - \eta_{x,g}\eta_{x,l} \left[ \frac{1}{m} \sum_{i \in S_t} \sum_{j \in [K]} \left( \nabla_x f_i(\mathbf{z}_{t,i}^j, \xi_{t,i}^j) - \mathbf{v}_x^i + \bar{\mathbf{v}}_{x,t} \right) \right], \\
\mathbf{y}_{t+1} &= \mathbf{y}_t + \eta_{y,g}\eta_{y,l} \left[ \frac{1}{m} \sum_{i \in S_t} \sum_{j \in [K]} \left( \nabla_y f_i(\mathbf{z}_{t,i}^j, \xi_{t,i}^j) - \mathbf{v}_y^i + \bar{\mathbf{v}}_{y,t} \right) \right], \\
\mathbf{e}_{x,t} &= \frac{1}{mK} \sum_{i \in S_t} \sum_{j \in [K]} \left[ \nabla_x f_i(\mathbf{z}_t) - \left( \nabla_x f_i(\mathbf{z}_{t,i}^j, \xi_{t,i}^j) - \mathbf{v}_x^i + \bar{\mathbf{v}}_{x,t} \right) \right] \\
\bar{\mathbf{e}}_{x,t} &= \mathbb{E}[\mathbf{e}_{x,t}] = \frac{1}{mK} \sum_{i \in S_t} \sum_{j \in [K]} \left( \nabla_x f_i(\mathbf{z}_t) - \nabla_x f_i(\mathbf{z}_{t,i}^j) \right), \\
\mathbf{e}_{y,t} &= \frac{1}{mK} \sum_{i \in S_t} \sum_{j \in [K]} \left[ \nabla_y f_i(\mathbf{z}_t) - \left( \nabla_y f_i(\mathbf{z}_{t,i}^j, \xi_{t,i}^j) - \mathbf{v}_y^i + \bar{\mathbf{v}}_{y,t} \right) \right] \\
\bar{\mathbf{e}}_{y,t} &= \mathbb{E}[\mathbf{e}_{y,t}] = \frac{1}{mK} \sum_{i \in S_t} \sum_{j \in [K]} \left( \nabla_y f_i(\mathbf{z}_t) - \nabla_y f_i(\mathbf{z}_{t,i}^j) \right),
\end{aligned}$$

where we define  $\mathbf{v}_x^i = \nabla_x f_i(\mathbf{w}_{t,i}, \xi)$  and  $\bar{\mathbf{v}}_{x,t} = \frac{1}{M} \sum_{i \in [M]} \mathbf{v}_x^i$  with a sequence of parameters  $\mathbf{w}_{t,i}$  such that

$$\mathbf{w}_{t,i} := \begin{cases} \mathbf{z}_{t-1}, & \text{if } i \in S_{t-1}, \\ \mathbf{w}_{t-1,i}, & \text{otherwise.} \end{cases}$$

We further have the following definition for notational clarity:

$$\begin{aligned}
\Delta \mathbf{x}_t &= \frac{1}{mK} \sum_{i \in S_t} \sum_{j \in [K]} \left[ \nabla_x f_i(\mathbf{z}_{t,i}^j, \xi_{t,i}^j) - \mathbf{v}_x^i + \bar{\mathbf{v}}_{x,t} \right], \\
\Delta \mathbf{y}_t &= \frac{1}{mK} \sum_{i \in S_t} \sum_{j \in [K]} \left[ \nabla_y f_i(\mathbf{z}_{t,i}^j, \xi_{t,i}^j) - \mathbf{v}_y^i + \bar{\mathbf{v}}_{y,t} \right], \\
\Psi_t &= \frac{1}{MK} \sum_{i \in [M]} \sum_{j \in [K]} \mathbb{E} \left\| \mathbf{z}_{t,i}^j - \mathbf{z}_t \right\|^2, \\
\Gamma_t &= \frac{1}{M} \sum_{i \in [M]} \mathbb{E} \left\| \mathbf{w}_{t,i} - \mathbf{z}_t \right\|^2.
\end{aligned}$$

**Lemma 5** (Iterative Control Variate).

$$\Gamma_t = \left(1 - \frac{m}{2M}\right) \Gamma_{t-1} + \left(\frac{m}{M} + \frac{M}{m} - 1\right) \mathbb{E} \left\| \mathbf{z}_t - \mathbf{z}_{t-1} \right\|^2.$$

*Proof.*

$$\begin{aligned}
\Gamma_t &= \frac{1}{M} \sum_{i \in [M]} \mathbb{E} \left\| \mathbf{w}_{t,i} - \mathbf{z}_t \right\|^2 \\
&= \left(1 - \frac{m}{M}\right) \frac{1}{M} \sum_{i \in [M]} \mathbb{E} \left\| \mathbf{w}_{t-1,i} - \mathbf{z}_t \right\|^2 + \frac{m}{M} \mathbb{E} \left\| \mathbf{z}_{t-1} - \mathbf{z}_t \right\|^2 \\
&\leq \left(1 - \frac{m}{M}\right) \left(1 + \frac{1}{b}\right) \Gamma_{t-1} + \left[\left(1 - \frac{m}{M}\right) (1+b) + \frac{m}{M}\right] \mathbb{E} \left\| \mathbf{z}_t - \mathbf{z}_{t-1} \right\|^2 \\
&= \left(1 - \frac{m}{2M}\right) \Gamma_{t-1} + \left(\frac{m}{M} + \frac{M}{m} - 1\right) \mathbb{E} \left\| \mathbf{z}_t - \mathbf{z}_{t-1} \right\|^2,
\end{aligned}$$

where we set  $b = \frac{2M}{m} - 1$ . □



**Lemma 6** (Local Step Distance for SAGDA Option I).  $\forall i \in [M], j \in [K]$ , we can bound the local step distance as follows:

$$\begin{aligned} \frac{1}{M} \sum_{i \in [M]} \mathbb{E} \left\| \left( \mathbf{z}_{t,i}^j - \mathbf{z}_t \right) \right\|^2 &\leq 160K^2 (\eta_{x,l}^2 + \eta_{y,l}^2) L_f^2 \Gamma_t + 10K^2 (\eta_{x,l}^2 \sigma_x^2 + \eta_{y,l}^2 \sigma_y^2) \\ &\quad + 40K^2 \left( \eta_{x,l}^2 \mathbb{E} \|\nabla_x f(\mathbf{z}_t)\|^2 + \eta_{y,l}^2 \mathbb{E} \|\nabla_y f(\mathbf{z}_t)\|^2 \right). \end{aligned}$$

*Proof.* First, we bound the local update as follows:

$$\begin{aligned} &\mathbb{E} \left\| \left( \nabla_x f_i(\mathbf{z}_{t,i}^j, \xi_{t,i}^j) - \mathbf{v}_x^i + \bar{\mathbf{v}}_{x,t} \right) \right\|^2 \\ &\leq 4 \left[ \mathbb{E} \left\| \nabla_x f_i(\mathbf{z}_{t,i}^j) - \nabla_x f_i(\mathbf{z}_t) \right\|^2 + \mathbb{E} \left\| \mathbb{E}[\mathbf{v}_x^i] - \nabla_x f_i(\mathbf{z}_t) \right\|^2 + \mathbb{E} \left\| \mathbb{E}[\bar{\mathbf{v}}_{x,t}] - \nabla_x f(\mathbf{z}_t) \right\|^2 \right. \\ &\quad \left. + \|\nabla_x f(\mathbf{z}_t)\|^2 \right] + \sigma_x^2 \\ &\leq 4L_f^2 \mathbb{E} \left\| \mathbf{z}_{t,i}^j - \mathbf{z}_t \right\|^2 + 4L_f^2 \mathbb{E} \|\mathbf{w}_{t,i} - \mathbf{z}_t\|^2 + 4L_f^2 \mathbb{E} \|\mathbb{E}[\bar{\mathbf{v}}_{x,t}] - \nabla_x f(\mathbf{z}_t)\|^2 \\ &\quad + 4\mathbb{E} \|\nabla_x f(\mathbf{z}_t)\|^2 + \sigma_x^2. \end{aligned}$$

That is,

$$\begin{aligned} &\frac{1}{M} \sum_{i \in [M]} \mathbb{E} \left\| \left( \nabla_x f_i(\mathbf{z}_{t,i}^j, \xi_{t,i}^j) - \mathbf{v}_x^i + \bar{\mathbf{v}}_{x,t} \right) \right\|^2 \\ &\leq 4L_f^2 \frac{1}{M} \sum_{i \in [M]} \mathbb{E} \left\| \mathbf{z}_{t,i}^j - \mathbf{z}_t \right\|^2 + 8L_f^2 \Gamma_t + \sigma_x^2 + 4\mathbb{E} \|\nabla_x f(\mathbf{z}_t)\|^2. \end{aligned}$$

$$\begin{aligned} &\frac{1}{M} \sum_{i \in [M]} \mathbb{E} \left[ \left\| \mathbf{x}_{t,i}^{j+1} - \mathbf{x}_t \right\|^2 \right] = \frac{1}{M} \sum_{i \in [M]} \mathbb{E} \left[ \left\| \mathbf{x}_{t,i}^j - \mathbf{x}_t - \eta_{x,l} \left( \nabla_x f_i(\mathbf{z}_{t,i}^j, \xi_{t,i}^j) - \mathbf{v}_x^i + \bar{\mathbf{v}}_{x,t} \right) \right\|^2 \right] \\ &\leq \left( 1 + \frac{1}{2K-1} \right) \frac{1}{M} \sum_{i \in [M]} \mathbb{E} \left\| \mathbf{x}_{t,i}^j - \mathbf{x}_t \right\|^2 + 2K\eta_{x,l}^2 \frac{1}{M} \sum_{i \in [M]} \mathbb{E} \left\| \nabla_x f_i(\mathbf{z}_{t,i}^j, \xi_{t,i}^j) - \mathbf{v}_x^i + \bar{\mathbf{v}}_{x,t} \right\|^2 \\ &\leq \left( 1 + \frac{1}{2K-1} + 8KL_f^2 \eta_{x,l}^2 \right) \frac{1}{M} \sum_{i \in [M]} \mathbb{E} \left\| \mathbf{x}_{t,i}^j - \mathbf{x}_t \right\|^2 + 32K\eta_{x,l}^2 L_f^2 \Gamma_t \\ &\quad + 2K\eta_{x,l}^2 \sigma_x^2 + 8K\eta_{x,l}^2 \mathbb{E} \|\nabla_x f(\mathbf{z}_t)\|^2. \end{aligned}$$

We can bound  $\left\| \mathbf{y}_{t,i}^{j+1} - \mathbf{y}_t \right\|^2$  in the same way, and then we have

$$\begin{aligned} &\frac{1}{M} \sum_{i \in [M]} \mathbb{E} \left\| \left( \mathbf{z}_{t,i}^{j+1} - \mathbf{z}_t \right) \right\|^2 \\ &\leq \left( 1 + \frac{1}{2K-1} + 8KL_f^2 \max\{\eta_{x,l}^2, \eta_{y,l}^2\} \right) \frac{1}{M} \sum_{i \in [M]} \mathbb{E} \left\| \mathbf{z}_{t,i}^j - \mathbf{z}_t \right\|^2 + \left[ 32K (\eta_{x,l}^2 + \eta_{y,l}^2) L_f^2 \Gamma_t \right. \\ &\quad \left. + 2K (\eta_{x,l}^2 \sigma_x^2 + \eta_{y,l}^2 \sigma_y^2) + 8K \left( \eta_{x,l}^2 \mathbb{E} \|\nabla_x f(\mathbf{z}_t)\|^2 + \eta_{y,l}^2 \mathbb{E} \|\nabla_y f(\mathbf{z}_t)\|^2 \right) \right] \\ &\leq \left( 1 + \frac{1}{K-1} \right) \frac{1}{M} \sum_{i \in [M]} \mathbb{E} \left\| \mathbf{z}_{t,i}^j - \mathbf{z}_t \right\|^2 \left[ 32K (\eta_{x,l}^2 + \eta_{y,l}^2) L_f^2 \Gamma_t \right. \\ &\quad \left. + 2K (\eta_{x,l}^2 \sigma_x^2 + \eta_{y,l}^2 \sigma_y^2) + 8K \left( \eta_{x,l}^2 \mathbb{E} \|\nabla_x f(\mathbf{z}_t)\|^2 + \eta_{y,l}^2 \mathbb{E} \|\nabla_y f(\mathbf{z}_t)\|^2 \right) \right] \end{aligned}$$

$$\begin{aligned}
&\leq \sum_{\tau=0}^{j-1} \left(1 + \frac{1}{K-1}\right)^\tau \left[ 32K (\eta_{x,l}^2 + \eta_{y,l}^2) L_f^2 \Gamma_t \right. \\
&\quad \left. + 2K (\eta_{x,l}^2 \sigma_x^2 + \eta_{y,l}^2 \sigma_y^2) + 8K \left( \eta_{x,l}^2 \mathbb{E} \|\nabla_x f(\mathbf{z}_t)\|^2 + \eta_{y,l}^2 \mathbb{E} \|\nabla_y f(\mathbf{z}_t)\|^2 \right) \right] \\
&\leq 160K^2 (\eta_{x,l}^2 + \eta_{y,l}^2) L_f^2 \Gamma_t + 10K^2 (\eta_{x,l}^2 \sigma_x^2 + \eta_{y,l}^2 \sigma_y^2) \\
&\quad + 40K^2 \left( \eta_{x,l}^2 \mathbb{E} \|\nabla_x f(\mathbf{z}_t)\|^2 + \eta_{y,l}^2 \mathbb{E} \|\nabla_y f(\mathbf{z}_t)\|^2 \right).
\end{aligned}$$

The learning rates should satisfy

$$4K \max\{L_f^2 \eta_{x,l}^2, L_f^2 \eta_{y,l}^2\} \leq \frac{1}{2(K-1)(2K-1)}, \quad (10)$$

□

**Lemma 7.**

$$\begin{aligned}
\mathbb{E} \|\Delta \mathbf{x}_t\|^2 &\leq 4L_f^2 \Psi_t + 4L_f^2 \Gamma_t + 4 \|\nabla_x f(\mathbf{z}_t)\|^2 + \frac{9}{mK} \sigma_x^2, \\
\mathbb{E} \|\Delta \mathbf{y}_t\|^2 &\leq 4L_f^2 \Psi_t + 4L_f^2 \Gamma_t + 4 \|\nabla_y f(\mathbf{z}_t)\|^2 + \frac{9}{mK} \sigma_y^2, \\
\mathbb{E} \|\mathbf{z}_{t+1} - \mathbf{z}_t\|^2 &\leq 4L_f^2 K^2 (\eta_x^2 + \eta_y^2) \Psi_t + 4L_f^2 K^2 (\eta_x^2 + \eta_y^2) \Gamma_t \\
&\quad + 4K^2 \left( \eta_x^2 \|\nabla_x f(\mathbf{z}_t)\|^2 + \eta_y^2 \|\nabla_y f(\mathbf{z}_t)\|^2 \right) + \frac{9K}{m} (\eta_x^2 \sigma_x^2 + \eta_y^2 \sigma_y^2).
\end{aligned}$$

*Proof.*

$$\begin{aligned}
\mathbb{E} \|\Delta \mathbf{x}_t\|^2 &\leq \mathbb{E} \left\| \frac{1}{mK} \sum_{i \in S_t} \sum_{j \in [K]} \left[ \nabla_x f_i(\mathbf{z}_{t,i}^j) - \mathbb{E}[\mathbf{v}_x^i] + \mathbb{E}[\bar{\mathbf{v}}_{x,t}] \right] \right\|^2 + \frac{9}{mK} \sigma_x^2 \\
&\leq \frac{4}{MK} \sum_{i \in [M]} \sum_{j \in [K]} \left[ \mathbb{E} \left\| \nabla_x f_i(\mathbf{z}_{t,i}^j) - \nabla_x f_i(\mathbf{z}_t) \right\|^2 + \mathbb{E} \|\mathbb{E}[\mathbf{v}_x^i] - \nabla_x f_i(\mathbf{z}_t)\|^2 \right. \\
&\quad \left. + \mathbb{E} \|\mathbb{E}[\bar{\mathbf{v}}_{x,t}] - \nabla_x f(\mathbf{z}_t)\|^2 + \|\nabla_x f(\mathbf{z}_t)\|^2 \right] + \frac{9}{mK} \sigma_x^2 \\
&\leq \frac{4}{MK} \sum_{i \in [M]} \sum_{j \in [K]} \left[ L_f^2 \mathbb{E} \|\mathbf{z}_{t,i}^j - \mathbf{z}_t\|^2 + L_f^2 \mathbb{E} \|\mathbf{w}_{t,i} - \mathbf{z}_t\|^2 + \|\nabla_x f(\mathbf{z}_t)\|^2 \right] + \frac{9}{mK} \sigma_x^2 \\
&= 4L_f^2 \Psi_t + 4L_f^2 \Gamma_t + 4 \|\nabla_x f(\mathbf{z}_t)\|^2 + \frac{9}{mK} \sigma_x^2,
\end{aligned}$$

$\mathbb{E}[\mathbf{v}_x^i] = \nabla_x f_i(\mathbf{z}_t)$  and  $\mathbb{E}[\bar{\mathbf{v}}_{x,t}] = \nabla_x f(\mathbf{z}_t)$  where the second inequality is due to Lemma 4 in [28].

The bound of  $\|(\mathbf{u}_{y,t} - \mathbf{e}_{y,t})\|^2$  follows from the similar proof. □

**Lemma 8** (Bounded Error for SAGDA Option I).

$$\begin{aligned}
\mathbb{E} \|\bar{\mathbf{e}}_{x,t}\|^2 &\leq L_f^2 \Psi_t, \\
\mathbb{E} \|\bar{\mathbf{e}}_{y,t}\|^2 &\leq L_f^2 \Psi_t.
\end{aligned}$$

*Proof.*

$$\begin{aligned}
\mathbb{E} \|\bar{\mathbf{e}}_{x,t}\|^2 &= \mathbb{E} \left\| \frac{1}{mK} \sum_{i \in S_t} \sum_{j \in [K]} \left( \nabla_x f_i(\mathbf{z}_t) - \nabla_x f_i(\mathbf{z}_{t,i}^j) \right) \right\|^2 \\
&\leq \frac{1}{mK} \mathbb{E} \left[ \sum_{i \in S_t} \sum_{j \in [K]} \left\| \nabla_x f_i(\mathbf{z}_t) - \nabla_x f_i(\mathbf{z}_{t,i}^j) \right\|^2 \right]
\end{aligned}$$

$$\begin{aligned}
&\leq \frac{L_f^2}{MK} \sum_{i \in [M], j \in [K]} \mathbb{E} \left\| \mathbf{z}_t - \mathbf{z}_{t,i}^j \right\|^2 \\
&= L_f^2 \Psi_t.
\end{aligned}$$

$\mathbb{E} \|\bar{\mathbf{e}}_{y,t}\|^2$  has the same bounds.  $\square$

**Theorem 1** (Convergence Rate of SAGDA). *Under Assumptions 1- 3, define  $\mathcal{L}_t = \Phi(\mathbf{x}_t) - \frac{1}{10}f(\mathbf{x}_t, \mathbf{y}_t)$ , the output sequence  $\{\mathbf{x}_t\}$  generated by SAGDA satisfies:*

- For Option I with learning rates  $\eta_{x,g}$ ,  $\eta_{x,l}$ ,  $\eta_{y,g}$ , and  $\eta_{y,l}$  satisfying

$$\begin{aligned}
&8K(K-1)(2K-1)L_f^2 \max\{\eta_{x,l}^2, \eta_{y,l}^2\} \leq 1, \\
&\frac{1}{2} - 4a_2L_f^2K^2(\eta_x^2 + \eta_y^2) - (a_1 + a_24L_f^2K^2(\eta_x^2 + \eta_y^2))160K^2(\eta_{x,l}^2 + \eta_{y,l}^2)L_f^2 \geq 0, \\
&\left[ \frac{1}{10}\eta_xK - 4a_2K^2\eta_x^2 \right] - [a_1 + a_24L_f^2K^2(\eta_x^2 + \eta_y^2)]40K^2\eta_{x,l}^2 \geq 0, \\
&\left[ \eta_yK \left( \frac{1}{20} - \frac{\eta_xL_f^2}{\eta_y\mu^2} \right) - 4a_2K^2\eta_y^2 \right] - [a_1 + a_24L_f^2K^2(\eta_x^2 + \eta_y^2)]40K^2\eta_{y,l}^2 \geq 0,
\end{aligned}$$

where  $a_1 = KL_f^2 \left( \frac{31}{20}\eta_x + \frac{1}{20}\eta_y \right)$  and  $a_2 = \frac{1}{2} \left( L + \frac{L_f}{10} \right) + 1 + \frac{M^2}{m^2} - \frac{M}{m}$ , it holds that

$$\frac{1}{T} \sum_{t=0}^{T-1} \mathbb{E} \|\nabla \Phi(\mathbf{x}_t)\|^2 \leq \underbrace{\frac{2(\mathcal{L}_0 - \mathcal{L}_*)}{\eta_xKT}}_{\text{optimization error}} + \underbrace{\left[ \left( L + \frac{L_f}{10} \right) + 4 \right] \frac{9}{m\eta_x} (\eta_x^2\sigma_x^2 + \eta_y^2\sigma_y^2)}_{\text{statistical error}} + \underbrace{\psi_1}_{\text{local update error}}$$

where  $\psi_1$  is defined as follows:

$$\psi_1 = \left[ L_f^2 \left( \frac{31}{20} + \frac{1}{20} \frac{\eta_y}{\eta_x} \right) + \left[ \frac{1}{2} \left( L + \frac{L_f}{10} \right) + 2 \right] 4L_f^2K \left( \eta_x + \frac{\eta_y^2}{\eta_x} \right) \right] [20K^2(\eta_{x,l}^2\sigma_x^2 + \eta_{y,l}^2\sigma_y^2)].$$

- For Option II with learning rates  $\eta_{x,g}$ ,  $\eta_{x,l}$ ,  $\eta_{y,g}$ , and  $\eta_{y,l}$  satisfying

$$\begin{aligned}
&8K(K-1)(2K-1)L_f^2 \max\{\eta_{x,l}^2, \eta_{y,l}^2\} \leq 1, \\
&\frac{1}{10}\eta_xK - \left( 2 \left( L + \frac{L_f}{10} \right) \eta_x^2K^2 + 40K^2\eta_{x,l}^2b_1 \right) \geq 0, \\
&\eta_yK \left( \frac{1}{20} - \frac{\eta_xL_f^2}{\eta_y\mu^2} \right) - \left( \frac{1}{5}L_f\eta_y^2K^2 + 40K^2\eta_{y,l}^2b_1 \right) \geq 0,
\end{aligned}$$

where  $b_1 = L_f^2 \left[ \frac{31}{20}\eta_xK + \frac{1}{20}\eta_yK + 2 \left( L + \frac{L_f}{10} \right) \eta_x^2K^2 + \frac{1}{5}L_f\eta_y^2K^2 \right]$ , it holds that

$$\frac{1}{T} \sum_{t=0}^{T-1} \mathbb{E} \|\nabla \Phi(\mathbf{x}_t)\|^2 \leq \frac{2(\mathcal{L}_0 - \mathcal{L}_*)}{\eta_xKT} + \left[ \left( L + \frac{L_f}{10} \right) \frac{9\eta_x}{m}\sigma_x^2 + \frac{9}{10}L_f \frac{\eta_y^2}{m\eta_x}\sigma_y^2 \right] + \psi_2.$$

where  $\psi_2$  is defined as follows:

$$\psi_2 = L_f^2 \left[ \frac{31}{20}K + \frac{1}{20} \frac{\eta_y}{\eta_x}K + 2 \left( L + \frac{L_f}{10} \right) \eta_xK^2 + \frac{1}{5}L_f \frac{\eta_y^2}{\eta_x}K^2 \right] [10(16K+1)] (\eta_{x,l}^2\sigma_x^2 + \eta_{y,l}^2\sigma_y^2).$$

*Proof.* Similar to the bound of  $\Phi$  and  $f$  in (2) and (3), we have the following results:

$$\mathbb{E}\Phi(\mathbf{x}_{t+1}) - \Phi(\mathbf{x}_t) \leq -\frac{1}{2}\eta_xK \|\nabla \Phi(\mathbf{x}_t)\|^2 - \frac{1}{4}\eta_xK \|\nabla_x f(\mathbf{z}_t)\|^2 + \frac{3}{2}\eta_xK \mathbb{E} \|\bar{\mathbf{e}}_{x,t}\|^2$$

$$+ \eta_x K \frac{L_f^2}{\mu^2} \|\nabla_y f(\mathbf{z}_t)\|^2 + \frac{1}{2} L \eta_x^2 K^2 \mathbb{E} \|\mathbf{u}_{x,t} - \mathbf{e}_{x,t}\|^2.$$

$$\begin{aligned} f(\mathbf{z}_t) - \mathbb{E}f(\mathbf{z}_{t+1}) &\leq \frac{3}{2} \eta_x K \|\nabla_x f(\mathbf{z}_t)\|^2 + \frac{1}{2} \eta_x K \mathbb{E} \|\bar{\mathbf{e}}_{x,t}\|^2 + \frac{1}{2} \eta_y K \mathbb{E} \|\bar{\mathbf{e}}_{y,t}\|^2 - \frac{1}{2} \eta_y K \|\nabla_y f(\mathbf{z}_t)\|^2 \\ &\quad + \frac{1}{2} L_f \eta_x^2 K^2 \|\mathbf{u}_{x,t} - \mathbf{e}_{x,t}\|^2 + \frac{1}{2} L_f \eta_y^2 K^2 \|\mathbf{u}_{y,t} - \mathbf{e}_{y,t}\|^2. \end{aligned}$$

Define potential function  $\mathcal{L}_t = \Phi(\mathbf{x}_t) - \frac{1}{10} f(\mathbf{z}_t)$ ,

$$\begin{aligned} \mathbb{E}\mathcal{L}_{t+1} - \mathcal{L}_t &= \mathbb{E}\Phi(\mathbf{x}_{t+1}) - \Phi(\mathbf{x}_t) + \frac{1}{10} (f(\mathbf{z}_t) - \mathbb{E}f(\mathbf{z}_{t+1})) \\ &\leq -\frac{1}{2} \eta_x K \|\nabla\Phi(\mathbf{x}_t)\|^2 - \frac{1}{10} \eta_x K \|\nabla_x f(\mathbf{z}_t)\|^2 - \eta_y K \left( \frac{1}{20} - \frac{\eta_x L_f^2}{\eta_y \mu^2} \right) \|\nabla_y f(\mathbf{z}_t)\|^2 \\ &\quad + \frac{31}{20} \eta_x K \|\bar{\mathbf{e}}_{x,t}\|^2 + \frac{1}{20} \eta_y K \|\bar{\mathbf{e}}_{y,t}\|^2 + \frac{1}{2} \left( L + \frac{L_f}{10} \right) \eta_x^2 K^2 \mathbb{E} \|\Delta \mathbf{x}_t\|^2 + \frac{1}{20} L_f \eta_y^2 K^2 \mathbb{E} \|\Delta \mathbf{y}_t\|^2 \\ &\leq -\frac{1}{2} \eta_x K \|\nabla\Phi(\mathbf{x}_t)\|^2 - \frac{1}{10} \eta_x K \|\nabla_x f(\mathbf{z}_t)\|^2 - \eta_y K \left( \frac{1}{20} - \frac{\eta_x L_f^2}{\eta_y \mu^2} \right) \|\nabla_y f(\mathbf{z}_t)\|^2 \\ &\quad + K L_f^2 \left( \frac{31}{20} \eta_x + \frac{1}{20} \eta_y \right) \Psi_t + \frac{1}{2} \left( L + \frac{L_f}{10} \right) \mathbb{E} \|\mathbf{z}_{t+1} - \mathbf{z}_t\|^2 \end{aligned}$$

$$(\mathbb{E}\mathcal{L}_{t+1} + \alpha \Gamma_{t+1}) - (\mathcal{L}_t + \alpha \Gamma_t)$$

$$\begin{aligned} &\leq -\frac{1}{2} \eta_x K \|\nabla\Phi(\mathbf{x}_t)\|^2 - \frac{1}{10} \eta_x K \|\nabla_x f(\mathbf{z}_t)\|^2 - \eta_y K \left( \frac{1}{20} - \frac{\eta_x L_f^2}{\eta_y \mu^2} \right) \|\nabla_y f(\mathbf{z}_t)\|^2 \\ &\quad + K L_f^2 \left( \frac{31}{20} \eta_x + \frac{1}{20} \eta_y \right) \Psi_t + \frac{1}{2} \left( L + \frac{L_f}{10} \right) \mathbb{E} \|\mathbf{z}_{t+1} - \mathbf{z}_t\|^2 + \alpha \Gamma_{t+1} - \alpha \Gamma_t \\ &\leq -\frac{1}{2} \eta_x K \|\nabla\Phi(\mathbf{x}_t)\|^2 - \frac{1}{10} \eta_x K \|\nabla_x f(\mathbf{z}_t)\|^2 - \eta_y K \left( \frac{1}{20} - \frac{\eta_x L_f^2}{\eta_y \mu^2} \right) \|\nabla_y f(\mathbf{z}_t)\|^2 \\ &\quad + \underbrace{K L_f^2 \left( \frac{31}{20} \eta_x + \frac{1}{20} \eta_y \right) \Psi_t}_{a_1} + \underbrace{\left[ \frac{1}{2} \left( L + \frac{L_f}{10} \right) + \alpha \left( \frac{m}{M} + \frac{M}{m} - 1 \right) \right]}_{a_2} \mathbb{E} \|\mathbf{z}_{t+1} - \mathbf{z}_t\|^2 - \alpha \frac{m}{2M} \Gamma_t \\ &\leq -\frac{1}{2} \eta_x K \|\nabla\Phi(\mathbf{x}_t)\|^2 - \frac{1}{10} \eta_x K \|\nabla_x f(\mathbf{z}_t)\|^2 - \eta_y K \left( \frac{1}{20} - \frac{\eta_x L_f^2}{\eta_y \mu^2} \right) \|\nabla_y f(\mathbf{z}_t)\|^2 \\ &\quad + [a_1 + a_2 4 L_f^2 K^2 (\eta_x^2 + \eta_y^2)] \Psi_t + \left[ 4 a_2 L_f^2 K^2 (\eta_x^2 + \eta_y^2) - \alpha \frac{m}{2M} \right] \Gamma_t \\ &\quad + a_2 \left[ 4 K^2 (\eta_x^2 \|\nabla_x f(\mathbf{z}_t)\|^2 + \eta_y^2 \|\nabla_y f(\mathbf{z}_t)\|^2) + \frac{9K}{m} (\eta_x^2 \sigma_x^2 + \eta_y^2 \sigma_y^2) \right] \\ &\leq -\frac{1}{2} \eta_x K \|\nabla\Phi(\mathbf{x}_t)\|^2 - \left[ \frac{1}{10} \eta_x K - 4 a_2 K^2 \eta_x^2 \right] \|\nabla_x f(\mathbf{z}_t)\|^2 \\ &\quad - \left[ \eta_y K \left( \frac{1}{20} - \frac{\eta_x L_f^2}{\eta_y \mu^2} \right) - 4 a_2 K^2 \eta_y^2 \right] \|\nabla_y f(\mathbf{z}_t)\|^2 + [a_1 + a_2 4 L_f^2 K^2 (\eta_x^2 + \eta_y^2)] \times \\ &\quad \left[ 10 K^2 (\eta_{x,l}^2 \sigma_x^2 + \eta_{y,l}^2 \sigma_y^2) + 40 K^2 (\eta_{x,l}^2 \mathbb{E} \|\nabla_x f(\mathbf{z}_t)\|^2 + \eta_{y,l}^2 \mathbb{E} \|\nabla_y f(\mathbf{z}_t)\|^2) \right] \\ &\quad - \left[ \alpha \frac{m}{2M} - 4 a_2 L_f^2 K^2 (\eta_x^2 + \eta_y^2) - (a_1 + a_2 4 L_f^2 K^2 (\eta_x^2 + \eta_y^2)) 160 K^2 (\eta_{x,l}^2 + \eta_{y,l}^2) L_f^2 \right] \Gamma_t \\ &\quad + a_2 \frac{9K}{m} (\eta_x^2 \sigma_x^2 + \eta_y^2 \sigma_y^2), \end{aligned}$$

where we can set  $\alpha = \frac{M}{m}$  and requires the learning rates  $\eta_x, \eta_y$  and  $\eta_{x,l}, \eta_{y,l}$  satisfy

$$\left[ \alpha \frac{m}{2M} - 4a_2 L_f^2 K^2 (\eta_x^2 + \eta_y^2) - (a_1 + a_2 4L_f^2 K^2 (\eta_x^2 + \eta_y^2)) 160K^2 (\eta_{x,l}^2 + \eta_{y,l}^2) L_f^2 \right] \geq 0, \quad (11)$$

$$\left[ \frac{1}{10} \eta_x K - 4a_2 K^2 \eta_x^2 \right] - [a_1 + a_2 4L_f^2 K^2 (\eta_x^2 + \eta_y^2)] 40K^2 \eta_{x,l}^2 \geq 0, \quad (12)$$

$$\left[ \eta_y K \left( \frac{1}{20} - \frac{\eta_x L_f^2}{\eta_y \mu^2} \right) - 4a_2 K^2 \eta_y^2 \right] - [a_1 + a_2 4L_f^2 K^2 (\eta_x^2 + \eta_y^2)] 40K^2 \eta_{y,l}^2 \geq 0. \quad (13)$$

$$\begin{aligned} & (\mathbb{E}\mathcal{L}_{t+1} + \alpha\Gamma_{t+1}) - (\mathcal{L}_t + \alpha\Gamma_t) \\ & \leq -\frac{1}{2}\eta_x K \|\nabla\Phi(\mathbf{x}_t)\|^2 + [a_1 + a_2 4L_f^2 K^2 (\eta_x^2 + \eta_y^2)] [10K^2 (\eta_{x,l}^2 \sigma_x^2 + \eta_{y,l}^2 \sigma_y^2)] + a_2 \frac{9K}{m} (\eta_x^2 \sigma_x^2 + \eta_y^2 \sigma_y^2) \\ & \leq -\frac{1}{2}\eta_x K \|\nabla\Phi(\mathbf{x}_t)\|^2 + \left[ \frac{1}{2} \left( L + \frac{L_f}{10} \right) + 2 \right] \frac{9K}{m} (\eta_x^2 \sigma_x^2 + \eta_y^2 \sigma_y^2) \\ & \quad + \left[ K L_f^2 \left( \frac{31}{20} \eta_x + \frac{1}{20} \eta_y \right) + \left[ \frac{1}{2} \left( L + \frac{L_f}{10} \right) + 2 \right] 4L_f^2 K^2 (\eta_x^2 + \eta_y^2) \right] [10K^2 (\eta_{x,l}^2 \sigma_x^2 + \eta_{y,l}^2 \sigma_y^2)] \end{aligned}$$

Note that  $\Gamma_0 = 0$ .

Telescoping and rearranging, we have:

$$\begin{aligned} \frac{1}{T} \sum_{t=0}^{T-1} \mathbb{E} \|\nabla\Phi(\mathbf{x}_t)\|^2 & \leq \frac{2(\mathcal{L}_0 - \mathcal{L}_*)}{\eta_x K T} + \left[ \left( L + \frac{L_f}{10} \right) + 4 \right] \frac{9}{m\eta_x} (\eta_x^2 \sigma_x^2 + \eta_y^2 \sigma_y^2) \\ & \quad + \left[ L_f^2 \left( \frac{31}{20} + \frac{1}{20} \frac{\eta_y}{\eta_x} \right) + \left[ \frac{1}{2} \left( L + \frac{L_f}{10} \right) + 2 \right] 4L_f^2 K \left( \eta_x + \frac{\eta_y^2}{\eta_x} \right) \right] [20K^2 (\eta_{x,l}^2 \sigma_x^2 + \eta_{y,l}^2 \sigma_y^2)]. \end{aligned}$$

□

### B.3 Proof for SAGDA Option II

For SAGDA Option II, the update rule is:

$$\begin{aligned} \mathbf{x}_{t+1} & = \mathbf{x}_t - \eta_{x,g} \eta_{x,l} \left[ \frac{1}{m} \sum_{i \in S_t} \sum_{j \in [K]} \left( \nabla_x f_i(\mathbf{z}_{t,i}^j, \xi_{t,i}^j) - \nabla_x f_i(\mathbf{z}_t, \xi_{t,i}) + \frac{1}{m} \sum_{i \in S_t} \nabla_x f_i(\mathbf{z}_t, \xi_{t,i}) \right) \right], \\ \mathbf{y}_{t+1} & = \mathbf{y}_t + \eta_{y,g} \eta_{y,l} \left[ \frac{1}{m} \sum_{i \in S_t} \sum_{j \in [K]} \left( \nabla_y f_i(\mathbf{z}_{t,i}^j, \xi_{t,i}^j) - \nabla_y f_i(\mathbf{z}_t, \xi_{t,i}) + \frac{1}{m} \sum_{i \in S_t} \nabla_y f_i(\mathbf{z}_t, \xi_{t,i}) \right) \right], \\ \mathbf{e}_{x,t} & = \frac{1}{mK} \sum_{i \in S_t} \sum_{j \in [K]} \left[ \nabla_x f_i(\mathbf{z}_t) - \left( \nabla_x f_i(\mathbf{z}_{t,i}^j, \xi_{t,i}^j) - \nabla_x f_i(\mathbf{z}_t, \xi_{t,i}) + \frac{1}{m} \sum_{i \in S_t} \nabla_x f_i(\mathbf{z}_t, \xi_{t,i}) \right) \right] \\ & = \frac{1}{mK} \sum_{i \in S_t} \sum_{j \in [K]} \left[ \nabla_x f_i(\mathbf{z}_t) - \nabla_x f_i(\mathbf{z}_{t,i}^j, \xi_{t,i}^j) \right], \\ \bar{\mathbf{e}}_{x,t} & = \mathbb{E}[\mathbf{e}_{x,t}] = \frac{1}{mK} \sum_{i \in S_t} \sum_{j \in [K]} \left( \nabla_x f_i(\mathbf{z}_t) - \nabla_x f_i(\mathbf{z}_{t,i}^j, \xi_{t,i}^j) \right), \\ \mathbf{e}_{y,t} & = \frac{1}{mK} \sum_{i \in S_t} \sum_{j \in [K]} \left[ \nabla_y f_i(\mathbf{z}_t) - \left( \nabla_y f_i(\mathbf{z}_{t,i}^j, \xi_{t,i}^j) - \nabla_y f_i(\mathbf{z}_t, \xi_{t,i}) + \frac{1}{m} \sum_{i \in S_t} \nabla_y f_i(\mathbf{z}_t, \xi_{t,i}) \right) \right] \\ & = \frac{1}{mK} \sum_{i \in S_t} \sum_{j \in [K]} \left( \nabla_y f_i(\mathbf{z}_t) - \nabla_y f_i(\mathbf{z}_{t,i}^j, \xi_{t,i}^j) \right), \end{aligned}$$

$$\bar{\mathbf{e}}_{y,t} = \mathbb{E}[\mathbf{e}_{y,t}] = \frac{1}{mK} \sum_{i \in S_t} \sum_{j \in [K]} \left( \nabla_y f_i(\mathbf{z}_t) - \nabla_y f_i(\mathbf{z}_{t,i}^j) \right).$$

**Lemma 9.**

$$\begin{aligned} \mathbb{E} \|\mathbf{u}_{x,t} - \mathbf{e}_{x,t}\|^2 &\leq \frac{4}{MK} \sum_{i \in [M]} \sum_{j \in [K]} \left[ L_f^2 \mathbb{E} \|\mathbf{z}_{t,i}^j - \mathbf{z}_t\|^2 + \|\nabla_x f(\mathbf{z}_t)\|^2 \right] + \frac{9}{mK} \sigma_x^2, \\ \mathbb{E} \|\mathbf{u}_{y,t} - \mathbf{e}_{y,t}\|^2 &\leq \frac{4}{MK} \sum_{i \in [M]} \sum_{j \in [K]} \left[ L_f^2 \mathbb{E} \|\mathbf{z}_{t,i}^j - \mathbf{z}_t\|^2 + \|\nabla_y f(\mathbf{z}_t)\|^2 \right] + \frac{9}{mK} \sigma_y^2. \end{aligned}$$

*Proof.*

$$\begin{aligned} \mathbb{E} \|\mathbf{u}_{x,t} - \mathbf{e}_{x,t}\|^2 &\leq \mathbb{E} \left\| \frac{1}{mK} \sum_{i \in S_t} \sum_{j \in [K]} \left[ \nabla_x f_i(\mathbf{z}_{t,i}^j) - \mathbb{E}[\mathbf{v}_{x,t}^i] + \mathbb{E}[\bar{\mathbf{v}}_{x,t}] \right] \right\|^2 + \frac{9}{mK} \sigma_x^2 \\ &\leq \frac{4}{MK} \sum_{i \in [M]} \sum_{j \in [K]} \left[ \mathbb{E} \|\nabla_x f_i(\mathbf{z}_{t,i}^j) - \nabla_x f_i(\mathbf{z}_t)\|^2 + \mathbb{E} \|\mathbb{E}[\mathbf{v}_{x,t}^i] - \nabla_x f_i(\mathbf{z}_t)\|^2 \right. \\ &\quad \left. + \mathbb{E} \|\mathbb{E}[\bar{\mathbf{v}}_{x,t}] - \nabla_x f(\mathbf{z}_t)\|^2 + \|\nabla_x f(\mathbf{z}_t)\|^2 \right] + \frac{9}{mK} \sigma_x^2 \\ &\leq \frac{4}{MK} \sum_{i \in [M]} \sum_{j \in [K]} \left[ L_f^2 \mathbb{E} \|\mathbf{z}_{t,i}^j - \mathbf{z}_t\|^2 + \|\nabla_x f(\mathbf{z}_t)\|^2 \right] + \frac{9}{mK} \sigma_x^2, \end{aligned}$$

where the last inequality is due to  $\mathbb{E}[\mathbf{v}_{x,t}^i] = \nabla_x f_i(\mathbf{z}_t)$  and  $\mathbb{E}[\bar{\mathbf{v}}_{x,t}] = \nabla_x f(\mathbf{z}_t)$ , and the second inequality is due to Lemma 4 in [28]).

The bound of  $\|\mathbf{u}_{y,t} - \mathbf{e}_{y,t}\|^2$  follows from the similar proof.  $\square$

**Lemma 10** (Bounded Error for SAGDA Option II).

$$\begin{aligned} \mathbb{E} \|\bar{\mathbf{e}}_{x,t}\|^2 &\leq \frac{L_f^2}{MK} \sum_{i \in [M], j \in [K]} \mathbb{E} \|\mathbf{z}_t - \mathbf{z}_{t,i}^j\|^2, \\ \mathbb{E} \|\bar{\mathbf{e}}_{y,t}\|^2 &\leq \frac{L_f^2}{MK} \sum_{i \in [M], j \in [K]} \mathbb{E} \|\mathbf{z}_t - \mathbf{z}_{t,i}^j\|^2. \end{aligned}$$

*Proof.*

$$\begin{aligned} \mathbb{E} \|\bar{\mathbf{e}}_{x,t}\|^2 &= \mathbb{E} \left\| \frac{1}{mK} \sum_{i \in S_t} \sum_{j \in [K]} \left( \nabla_x f_i(\mathbf{z}_t) - \nabla_x f_i(\mathbf{z}_{t,i}^j) \right) \right\|^2 \\ &\leq \frac{1}{mK} \mathbb{E} \left[ \sum_{i \in S_t} \sum_{j \in [K]} \left\| \nabla_x f_i(\mathbf{z}_t) - \nabla_x f_i(\mathbf{z}_{t,i}^j) \right\|^2 \right] \\ &\leq \frac{L_f^2}{MK} \sum_{i \in [M], j \in [K]} \mathbb{E} \|\mathbf{z}_t - \mathbf{z}_{t,i}^j\|^2. \end{aligned}$$

$\mathbb{E} \|\bar{\mathbf{e}}_{y,t}\|^2$  has the same bounds.  $\square$

**Lemma 11** (Local Step Distance for SAGDA Option II).  $\forall i \in [M], j \in [K]$ , we can bound the local step distance as follows:

$$\begin{aligned} &\mathbb{E} \left\| \mathbf{z}_t - \mathbf{z}_{t,i}^j \right\|^2 \\ &\leq 5K(16K+1)\eta_{x,l}^2 \sigma_x^2 + 5K(16K+1)\eta_{y,l}^2 \sigma_y^2 + 40K^2 \left( \eta_{x,l}^2 \mathbb{E} \|\nabla_x f(\mathbf{z}_t)\|^2 + \eta_{y,l}^2 \mathbb{E} \|\nabla_y f(\mathbf{z}_t)\|^2 \right). \end{aligned}$$

*Proof.*

$$\begin{aligned}
& \mathbb{E} \left\| \left( \mathbf{z}_t - \mathbf{z}_{t,i}^{j+1} \right) \right\|^2 = \mathbb{E} \left[ \left\| \mathbf{x}_{t,i}^j - \mathbf{x}_t - \eta_{x,l} \left( \nabla_x f_i(\mathbf{z}_{t,i}^j, \xi_{t,i}^j) - \mathbf{v}_{x,t}^i + \bar{\mathbf{v}}_{x,t} \right) \right\|^2 \right] \\
& \quad + \mathbb{E} \left[ \left\| \mathbf{y}_{t,i}^j - \mathbf{y}_t + \eta_{y,l} \left( \nabla_y f_i(\mathbf{z}_{t,i}^j, \xi_{t,i}^j) - \mathbf{v}_{y,t}^i + \bar{\mathbf{v}}_{y,t} \right) \right\|^2 \right] \\
& = \mathbb{E} \left[ \left\| \mathbf{x}_{t,i}^j - \mathbf{x}_t - \eta_{x,l} \left( \nabla_x f_i(\mathbf{z}_{t,i}^j) - \mathbf{v}_{x,t}^i + \bar{\mathbf{v}}_{x,t} \right) \right\|^2 \right] + \eta_{x,l}^2 \sigma_x^2 \\
& \quad + \mathbb{E} \left[ \left\| \mathbf{y}_{t,i}^j - \mathbf{y}_t + \eta_{y,l} \left( \nabla_y f_i(\mathbf{z}_{t,i}^j) - \mathbf{v}_{y,t}^i + \bar{\mathbf{v}}_{y,t} \right) \right\|^2 \right] + \eta_{y,l}^2 \sigma_y^2 \\
& = \left( 1 + \frac{1}{2K-1} \right) \mathbb{E} \left\| \mathbf{x}_{t,i}^j - \mathbf{x}_t \right\|^2 + 2K \mathbb{E} \left\| \eta_{x,l} \left( \nabla_x f_i(\mathbf{z}_{t,i}^j) - \mathbf{v}_{x,t}^i + \bar{\mathbf{v}}_{x,t} \right) \right\|^2 + \eta_{x,l}^2 \sigma_x^2 \\
& \quad + \left( 1 + \frac{1}{2K-1} \right) \mathbb{E} \left\| \mathbf{y}_{t,i}^j - \mathbf{y}_t \right\|^2 + 2K \mathbb{E} \left\| \eta_{y,l} \left( \nabla_y f_i(\mathbf{z}_{t,i}^j) - \mathbf{v}_{y,t}^i + \bar{\mathbf{v}}_{y,t} \right) \right\|^2 + \eta_{y,l}^2 \sigma_y^2 \\
& = \left( 1 + \frac{1}{2K-1} \right) \mathbb{E} \left\| \mathbf{z}_{t,i}^j - \mathbf{z}_t \right\|^2 + 2K \mathbb{E} \left\| \eta_{x,l} \left( \nabla_x f_i(\mathbf{z}_{t,i}^j) - \mathbf{v}_{x,t}^i + \bar{\mathbf{v}}_{x,t} \right) \right\|^2 + \eta_{x,l}^2 \sigma_x^2 \\
& \quad + 2K \mathbb{E} \left\| \eta_{y,l} \left( \nabla_y f_i(\mathbf{z}_{t,i}^j) - \mathbf{v}_{y,t}^i + \bar{\mathbf{v}}_{y,t} \right) \right\|^2 + \eta_{y,l}^2 \sigma_y^2 \\
& \leq \left( 1 + \frac{1}{2K-1} \right) \mathbb{E} \left\| \mathbf{z}_{t,i}^j - \mathbf{z}_t \right\|^2 + 2K \eta_{x,l}^2 \left[ 4L_f^2 \mathbb{E} \left\| \mathbf{z}_{t,i}^j - \mathbf{z}_t \right\|^2 + 8\sigma_x^2 + 4\mathbb{E} \left\| \nabla_x f(\mathbf{z}_t) \right\|^2 \right] \\
& \quad + 2K \eta_{y,l}^2 \left[ 4L_f^2 \mathbb{E} \left\| \mathbf{z}_{t,i}^j - \mathbf{z}_t \right\|^2 + 8\sigma_y^2 + 4\mathbb{E} \left\| \nabla_y f(\mathbf{z}_t) \right\|^2 \right] + \eta_{x,l}^2 \sigma_x^2 + \eta_{y,l}^2 \sigma_y^2 \\
& \leq \left( 1 + \frac{1}{2K-1} + 8K \max\{L_f^2 \eta_{x,l}^2, L_f^2 \eta_{y,l}^2\} \right) \mathbb{E} \left\| \mathbf{z}_{t,i}^j - \mathbf{z}_t \right\|^2 + (16K+1) \eta_{x,l}^2 \sigma_x^2 \\
& \quad + (16K+1) \eta_{y,l}^2 \sigma_y^2 + 8K \left( \eta_{x,l}^2 \mathbb{E} \left\| \nabla_x f(\mathbf{z}_t) \right\|^2 + \eta_{y,l}^2 \mathbb{E} \left\| \nabla_y f(\mathbf{z}_t) \right\|^2 \right) \\
& \leq \left( 1 + \frac{1}{K-1} \right) \mathbb{E} \left\| \mathbf{z}_{t,i}^j - \mathbf{z}_t \right\|^2 + (16K+1) \eta_{x,l}^2 \sigma_x^2 \\
& \quad + (16K+1) \eta_{y,l}^2 \sigma_y^2 + 8K \left( \eta_{x,l}^2 \mathbb{E} \left\| \nabla_x f(\mathbf{z}_t) \right\|^2 + \eta_{y,l}^2 \mathbb{E} \left\| \nabla_y f(\mathbf{z}_t) \right\|^2 \right) \\
& \leq \sum_{\tau=0}^{j-1} \left( 1 + \frac{1}{K-1} \right)^\tau \left[ (16K+1) \eta_{x,l}^2 \sigma_x^2 + (16K+1) \eta_{y,l}^2 \sigma_y^2 \right. \\
& \quad \left. + 8K \left( \eta_{x,l}^2 \mathbb{E} \left\| \nabla_x f(\mathbf{z}_t) \right\|^2 + \eta_{y,l}^2 \mathbb{E} \left\| \nabla_y f(\mathbf{z}_t) \right\|^2 \right) \right] \\
& \leq 5K(16K+1) \eta_{x,l}^2 \sigma_x^2 + 5K(16K+1) \eta_{y,l}^2 \sigma_y^2 + 40K^2 \left( \eta_{x,l}^2 \mathbb{E} \left\| \nabla_x f(\mathbf{z}_t) \right\|^2 + \eta_{y,l}^2 \mathbb{E} \left\| \nabla_y f(\mathbf{z}_t) \right\|^2 \right),
\end{aligned}$$

$\bar{\mathbf{v}}_{x,t} = \frac{1}{m} \sum_{i \in S_t} \nabla_x f_i(\mathbf{z}_t, \xi_{t,i})$  and  $\mathbf{v}_{x,t}^i = \nabla_x f_i(\mathbf{z}_t, \xi_{t,i})$ ;  $\bar{\mathbf{v}}_{y,t} = \frac{1}{m} \sum_{i \in S_t} \nabla_y f_i(\mathbf{z}_t, \xi_{t,i})$  and  $\mathbf{v}_{y,t}^i = \nabla_y f_i(\mathbf{z}_t, \xi_{t,i})$ ; where the first inequality is due to bounded variance of stochastic gradient, the second and third inequalities follow from the fact  $\|\mathbf{a} + \mathbf{b}\|^2 \leq \left(1 + \frac{1}{\epsilon}\right) \|\mathbf{a}\|^2 + (1 + \epsilon) \|\mathbf{b}\|^2$ , the fourth inequality is due to smoothness of  $f$  in  $x$  and  $y$ , fifth inequality holds if

$$4K \max\{L_f^2 \eta_{x,l}^2, L_f^2 \eta_{y,l}^2\} \leq \frac{1}{2(K-1)(2K-1)}, \quad (14)$$

and the last inequality follows from the  $\sum_{\tau=0}^{j-1} \left(1 + \frac{1}{K-1}\right)^\tau \leq (K-1) \left[ \left(1 + \frac{1}{K-1}\right)^K - 1 \right] \leq 5K$ .

$$\begin{aligned}
& \mathbb{E} \left\| \left( \nabla_x f_i(\mathbf{z}_{t,i}^j) - \mathbf{v}_{x,t}^i + \bar{\mathbf{v}}_{x,t} \right) \right\|^2 \\
& = \mathbb{E} \left\| \left( \nabla_x f_i(\mathbf{z}_{t,i}^j) - \nabla_x f_i(\mathbf{z}_t) \right) + \left( \nabla_x f_i(\mathbf{z}_t) - \mathbf{v}_{x,t}^i \right) + \left( \bar{\mathbf{v}}_{x,t} - \nabla_x f(\mathbf{z}_t) \right) + \nabla_x f(\mathbf{z}_t) \right\|^2
\end{aligned}$$

$$\begin{aligned}
&\leq 4\mathbb{E} \left\| \nabla_x f_i(\mathbf{z}_{t,i}^j) - \nabla_x f_i(\mathbf{z}_t) \right\|^2 + 4\mathbb{E} \left\| \nabla_x f_i(\mathbf{z}_t) - \mathbf{v}_{x,t}^i \right\|^2 + 4\mathbb{E} \left\| \bar{\mathbf{v}}_{x,t} - \nabla_x f(\mathbf{z}_t) \right\|^2 + 4\mathbb{E} \left\| \nabla_x f(\mathbf{z}_t) \right\|^2 \\
&\leq 4L_f^2 \mathbb{E} \left\| \mathbf{z}_{t,i}^j - \mathbf{z}_t \right\|^2 + 8\sigma_x^2 + 4\mathbb{E} \left\| \nabla_x f(\mathbf{z}_t) \right\|^2
\end{aligned}$$

□

*Proof.* Similar to the bound of  $\Phi$  and  $f$  in (2) and (3), we have the following results:

$$\begin{aligned}
\mathbb{E}\Phi(\mathbf{x}_{t+1}) - \Phi(\mathbf{x}_t) &\leq -\frac{1}{2}\eta_x K \left\| \nabla\Phi(\mathbf{x}_t) \right\|^2 - \frac{1}{4}\eta_x K \left\| \nabla_x f(\mathbf{z}_t) \right\|^2 + \frac{3}{2}\eta_x K \mathbb{E} \left\| \bar{\mathbf{e}}_{x,t} \right\|^2 \\
&\quad + \eta_x K \frac{L_f^2}{\mu^2} \left\| \nabla_y f(\mathbf{z}_t) \right\|^2 + \frac{1}{2}L_f \eta_x^2 K^2 \mathbb{E} \left\| \mathbf{u}_{x,t} - \mathbf{e}_{x,t} \right\|^2.
\end{aligned}$$

$$\begin{aligned}
f(\mathbf{z}_t) - \mathbb{E}f(\mathbf{z}_{t+1}) &\leq \frac{3}{2}\eta_x K \left\| \nabla_x f(\mathbf{z}_t) \right\|^2 + \frac{1}{2}\eta_x K \mathbb{E} \left\| \bar{\mathbf{e}}_{x,t} \right\|^2 + \frac{1}{2}\eta_y K \mathbb{E} \left\| \bar{\mathbf{e}}_{y,t} \right\|^2 - \frac{1}{2}\eta_y K \left\| \nabla_y f(\mathbf{z}_t) \right\|^2 \\
&\quad + \frac{1}{2}L_f \eta_x^2 K^2 \left\| \mathbf{u}_{x,t} - \mathbf{e}_{x,t} \right\|^2 + \frac{1}{2}L_f \eta_y^2 K^2 \left\| \mathbf{u}_{y,t} - \mathbf{e}_{y,t} \right\|^2.
\end{aligned}$$

Define potential function  $\mathcal{L}_t = \Phi(\mathbf{x}_t) - \frac{1}{10}f(\mathbf{z}_t)$ ,

$$\begin{aligned}
\mathbb{E}\mathcal{L}_{t+1} - \mathcal{L}_t &= \mathbb{E}\Phi(\mathbf{x}_{t+1}) - \Phi(\mathbf{x}_t) + \frac{1}{10} (f(\mathbf{z}_t) - \mathbb{E}f(\mathbf{z}_{t+1})) \\
&\leq -\frac{1}{2}\eta_x K \left\| \nabla\Phi(\mathbf{x}_t) \right\|^2 - \frac{1}{10}\eta_x K \left\| \nabla_x f(\mathbf{z}_t) \right\|^2 - \eta_y K \left( \frac{1}{20} - \frac{\eta_x L_f^2}{\eta_y \mu^2} \right) \left\| \nabla_y f(\mathbf{z}_t) \right\|^2 \\
&\quad + \frac{31}{20}\eta_x K \left\| \bar{\mathbf{e}}_{x,t} \right\|^2 + \frac{1}{20}\eta_y K \left\| \bar{\mathbf{e}}_{y,t} \right\|^2 \\
&\quad + \frac{1}{2} \left( L + \frac{L_f}{10} \right) \eta_x^2 K^2 \mathbb{E} \left\| \mathbf{u}_{x,t} - \mathbf{e}_{x,t} \right\|^2 + \frac{1}{20}L_f \eta_y^2 K^2 \mathbb{E} \left\| \mathbf{u}_{y,t} - \mathbf{e}_{y,t} \right\|^2 \\
&\leq -\frac{1}{2}\eta_x K \left\| \nabla\Phi(\mathbf{x}_t) \right\|^2 - \frac{1}{10}\eta_x K \left\| \nabla_x f(\mathbf{z}_t) \right\|^2 - \eta_y K \left( \frac{1}{20} - \frac{\eta_x L_f^2}{\eta_y \mu^2} \right) \left\| \nabla_y f(\mathbf{z}_t) \right\|^2 \\
&\quad + \left( \frac{31}{20}\eta_x K + \frac{1}{20}\eta_y K \right) \left[ \frac{L_f^2}{MK} \sum_{i \in [M], j \in [K]} \mathbb{E} \left\| \mathbf{z}_t - \mathbf{z}_{t,i}^j \right\|^2 \right] \\
&\quad + \frac{1}{2} \left( L + \frac{L_f}{10} \right) \eta_x^2 K^2 \left[ \frac{4}{MK} \sum_{i \in [M]} \sum_{j \in [K]} \left[ L_f^2 \mathbb{E} \left\| \mathbf{z}_{t,i}^j - \mathbf{z}_t \right\|^2 + \left\| \nabla_x f(\mathbf{z}_t) \right\|^2 \right] + \frac{9}{mK} \sigma_x^2 \right] \\
&\quad + \frac{1}{20}L_f \eta_y^2 K^2 \left[ \frac{4}{MK} \sum_{i \in [M]} \sum_{j \in [K]} \left[ L_f^2 \mathbb{E} \left\| \mathbf{z}_{t,i}^j - \mathbf{z}_t \right\|^2 + \left\| \nabla_y f(\mathbf{z}_t) \right\|^2 \right] + \frac{9}{mK} \sigma_y^2 \right] \\
&\leq -\frac{1}{2}\eta_x K \left\| \nabla\Phi(\mathbf{x}_t) \right\|^2 - \frac{1}{10}\eta_x K \left\| \nabla_x f(\mathbf{z}_t) \right\|^2 - \eta_y K \left( \frac{1}{20} - \frac{\eta_x L_f^2}{\eta_y \mu^2} \right) \left\| \nabla_y f(\mathbf{z}_t) \right\|^2 \\
&\quad + \underbrace{L_f^2 \left[ \frac{31}{20}\eta_x K + \frac{1}{20}\eta_y K + 2 \left( L + \frac{L_f}{10} \right) \eta_x^2 K^2 + \frac{1}{5}L_f \eta_y^2 K^2 \right]}_{a_1} \left[ \frac{1}{MK} \sum_{i \in [M], j \in [K]} \mathbb{E} \left\| \mathbf{z}_t - \mathbf{z}_{t,i}^j \right\|^2 \right] \\
&\quad + \underbrace{2 \left( L + \frac{L_f}{10} \right) \eta_x^2 K^2 \left\| \nabla_x f(\mathbf{z}_t) \right\|^2 + \frac{1}{2} \left( L + \frac{L_f}{10} \right) \eta_x^2 K^2 \frac{9}{mK} \sigma_x^2}_{a_2} \\
&\quad + \underbrace{\frac{1}{5}L_f \eta_y^2 K^2 \left\| \nabla_y f(\mathbf{z}_t) \right\|^2 + \frac{1}{20}L_f \eta_y^2 K^2 \frac{9}{mK} \sigma_y^2}_{a_3}
\end{aligned}$$



$$\begin{aligned}
&\leq -\frac{1}{2}\eta_x K \|\nabla\Phi(\mathbf{x}_t)\|^2 - \frac{1}{10}\eta_x K \|\nabla_x f(\mathbf{z}_t)\|^2 - \eta_y K \left( \frac{1}{20} - \frac{\eta_x L_f^2}{\eta_y \mu^2} \right) \|\nabla_y f(\mathbf{z}_t)\|^2 \\
&\quad + \left[ 5K(16K+1)\eta_{x,l}^2 a_1 + \frac{1}{2} \left( L + \frac{L_f}{10} \right) \eta_x^2 \frac{9K}{m} \right] \sigma_x^2 + \left[ 5K(16K+1)\eta_{y,l}^2 a_1 + \frac{1}{20} L_f \eta_y^2 \frac{9K}{m} \right] \sigma_y^2 \\
&\quad + (a_2 + 40K^2 \eta_{x,l}^2 a_1) \|\nabla_x f(\mathbf{z}_t)\|^2 + (a_3 + 40K^2 \eta_{y,l}^2 a_1) \|\nabla_y f(\mathbf{z}_t)\|^2 \\
&\leq -\frac{1}{2}\eta_x K \|\nabla\Phi(\mathbf{x}_t)\|^2 + \left[ 5K(16K+1)\eta_{x,l}^2 a_1 + \frac{1}{2} \left( L + \frac{L_f}{10} \right) \eta_x^2 \frac{9K}{m} \right] \sigma_x^2 \\
&\quad + \left[ 5K(16K+1)\eta_{y,l}^2 a_1 + \frac{1}{20} L_f \eta_y^2 \frac{9K}{m} \right] \sigma_y^2
\end{aligned}$$

where the last inequality follows from the conditions:

$$\frac{1}{10}\eta_x K - (a_2 + 40K^2 \eta_{x,l}^2 a_1) \geq 0, \quad (15)$$

$$\eta_y K \left( \frac{1}{20} - \frac{\eta_x L_f^2}{\eta_y \mu^2} \right) - (a_3 + 40K^2 \eta_{y,l}^2 a_1) \geq 0. \quad (16)$$

Telescoping and rearranging, we have:

$$\begin{aligned}
\frac{1}{T} \sum_{t=0}^{T-1} \mathbb{E} \|\nabla\Phi(\mathbf{x}_t)\|^2 &\leq \frac{2(\mathcal{L}_0 - \mathcal{L}_*)}{\eta_x K T} + \left[ 10(16K+1)\eta_{x,l}^2 \frac{a_1}{\eta_x} + \left( L + \frac{L_f}{10} \right) \frac{9\eta_x}{m} \right] \sigma_x^2 \\
&\quad + \left[ 10(16K+1)\eta_{y,l}^2 \frac{a_1}{\eta_x} + \frac{9}{10} L_f \frac{\eta_y^2}{m\eta_x} \right] \sigma_y^2 \\
&\leq \frac{2(\mathcal{L}_0 - \mathcal{L}_*)}{\eta_x K T} + \left[ \left( L + \frac{L_f}{10} \right) \frac{9\eta_x}{m} \sigma_x^2 + \frac{9}{10} L_f \frac{\eta_y^2}{m\eta_x} \sigma_y^2 \right] \\
&\quad + L_f^2 \left[ \frac{31}{20} K + \frac{1}{20} \frac{\eta_y}{\eta_x} K + 2 \left( L + \frac{L_f}{10} \right) \eta_x K^2 + \frac{1}{5} L_f \frac{\eta_y^2}{\eta_x} K^2 \right] [10(16K+1)] (\eta_{x,l}^2 \sigma_x^2 + \eta_{y,l}^2 \sigma_y^2).
\end{aligned}$$

□
